# Supplementary material for: Ab initio investigations on the crystal structure, formation enthalpy, electronic structure, chemical bonding, and optical properties of experimentally synthesized isoreticular metal–organic framework-10 and its analogues: M-IRMOF-10 (M = Zn, Cd, Be, Mg, Ca, Sr and Ba)
Source: Royal Society of Chemistry journal article supplement (doi:10.1039/c1ra00187f), 2011-12-23
Supplement: c1ra00187f.pdf [file c1ra00187f.pdf]

***Ab initio* investigations on the crystal structure, formation enthalpy, electronic structure, chemical bonding, and optical properties of experimentally synthesized isorecticular metal-organic framework-10 and its analogues: *M*-IRMOF-10 (*M* = Zn, Cd, Be, Mg, Ca, Sr and Ba)**

***Supporting Information***

Li-Ming Yang<sup>\*†</sup>, Ponniah Ravindran<sup>‡</sup>, Ponniah Vajeeston<sup>‡</sup>, and Mats Tilset<sup>\*†</sup>

<sup>†</sup>*Center of Theoretical and Computational Chemistry, Department of Chemistry, University of Oslo, P.O.Box 1033 Blindern, N-0315 Oslo, Norway,* <sup>‡</sup>*Center for Materials Science and Nanotechnology, Department of Chemistry, University of Oslo, P.O.Box 1033 Blindern, N-0315 Oslo, Norway*

(E-mail of corresponding authors: [mats.tilset@kjemi.uio.no](mailto:mats.tilset@kjemi.uio.no) and [l.m.yang@kjemi.uio.no](mailto:l.m.yang@kjemi.uio.no); Fax: +47 22855441;)

Page2, **Fig. S1.** Calculated charge density, charge transfer, and ELF plots for Cd-IRMOF-10  
Page3, **Fig. S2.** Calculated charge density, charge transfer, and ELF plots for Be-IRMOF-10  
Page4, **Fig. S3.** Calculated charge density, charge transfer, and ELF plots for Mg-IRMOF-10  
Page5, **Fig. S4.** Calculated charge density, charge transfer, and ELF plots for Ca-IRMOF-10  
Page6, **Fig. S5.** Calculated charge density, charge transfer, and ELF plots for Sr-IRMOF-10  
Page7, **Fig. S6.** Calculated charge density, charge transfer, and ELF plots for Ba-IRMOF-10

Page8, **Fig. S7.** The calculated TDOS and PDOS for Cd-IRMOF-10  
Page9, **Fig. S8.** The calculated TDOS and PDOS for Be-IRMOF-10  
Page10, **Fig. S9.** The calculated TDOS and PDOS for Mg-IRMOF-10  
Page11, **Fig. S10.** The calculated TDOS and PDOS for Ca-IRMOF-10  
Page12, **Fig. S11.** The calculated TDOS and PDOS for Sr-IRMOF-10  
Page13, **Fig. S12.** The calculated TDOS and PDOS for Ba-IRMOF-10

Page14, **Fig. S13.** Calculated optical properties for Cd-IRMOF-10  
Page15, **Fig. S14.** Calculated optical properties for Be-IRMOF-10  
Page16, **Fig. S15.** Calculated optical properties for Mg-IRMOF-10  
Page17, **Fig. S16.** Calculated optical properties for Ca-IRMOF-10  
Page18, **Fig. S17.** Calculated optical properties for Sr-IRMOF-10  
Page19, **Fig. S18.** Calculated optical properties for Ba-IRMOF-10

Page20, **Fig. S19.** The electronic band structure of Cd-IRMOF-10.  
Page21, **Fig. S20.** The electronic band structure of Be-IRMOF-10.  
Page22, **Fig. S21.** The electronic band structure of Mg-IRMOF-10.  
Page23, **Fig. S22.** The electronic band structure of Ca-IRMOF-10.  
Page24, **Fig. S23.** The electronic band structure of Sr-IRMOF-10.  
Page25, **Fig. S24.** The electronic band structure of Ba-IRMOF-10.

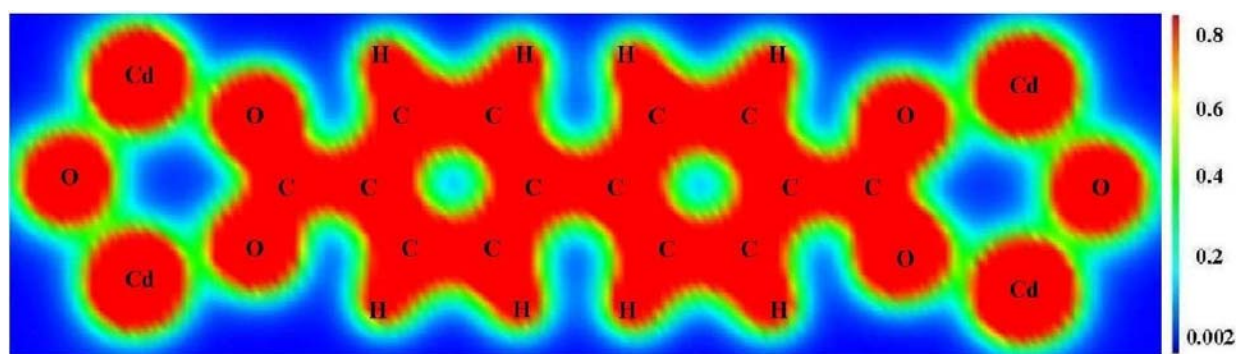

(a)

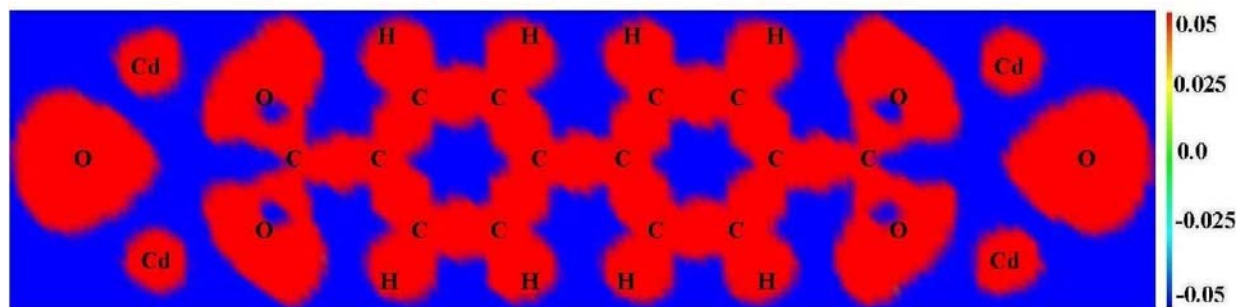

(b)

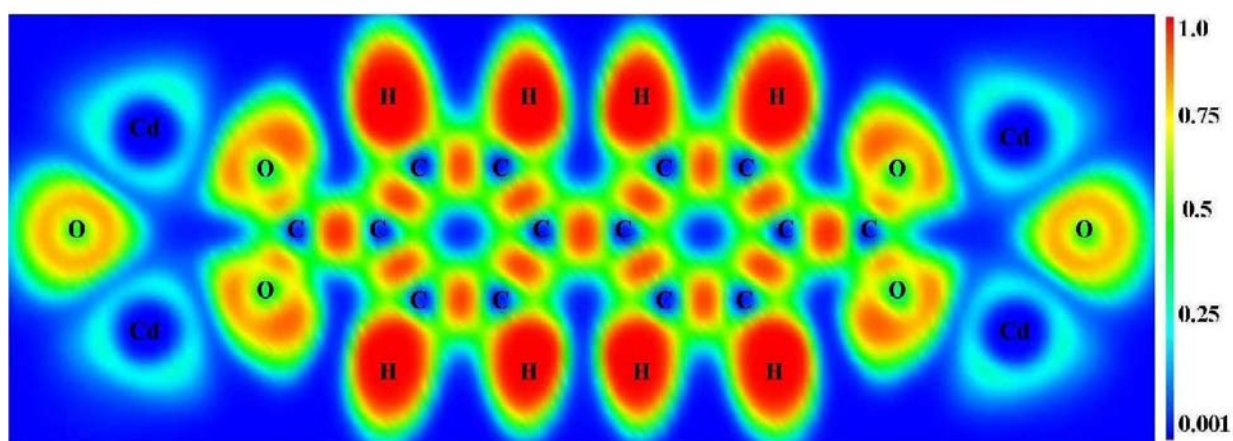

(c)

**Figure S1.** Calculated charge density (a), charge transfer (b), and electron localization function (c) plots for Cd-IRMOF-10 in the (110) plane.

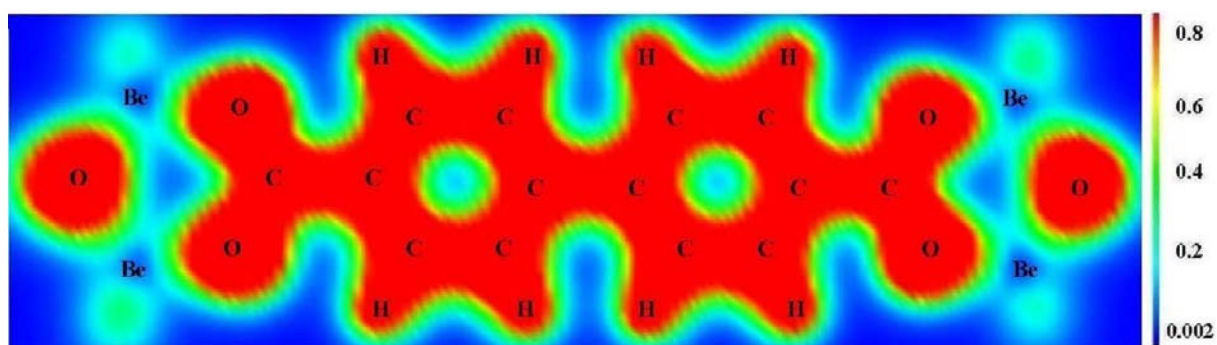

(a)

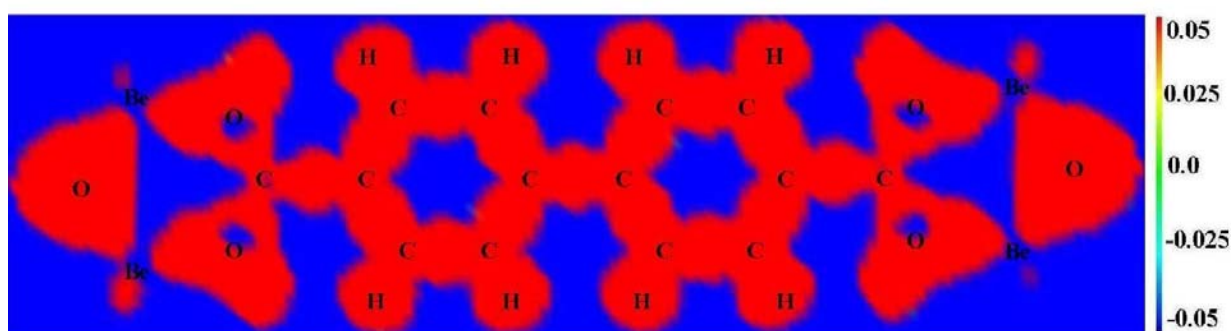

(b)

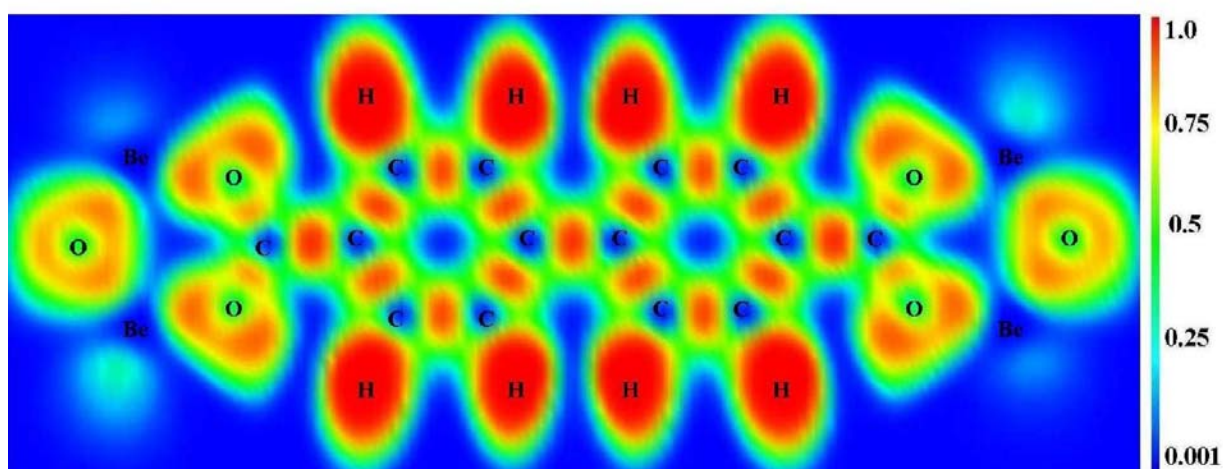

(c)

**Figure S2.** Calculated charge density (a), charge transfer (b), and electron localization function (c) plots for Be-IRMOF-10 in the (110) plane.



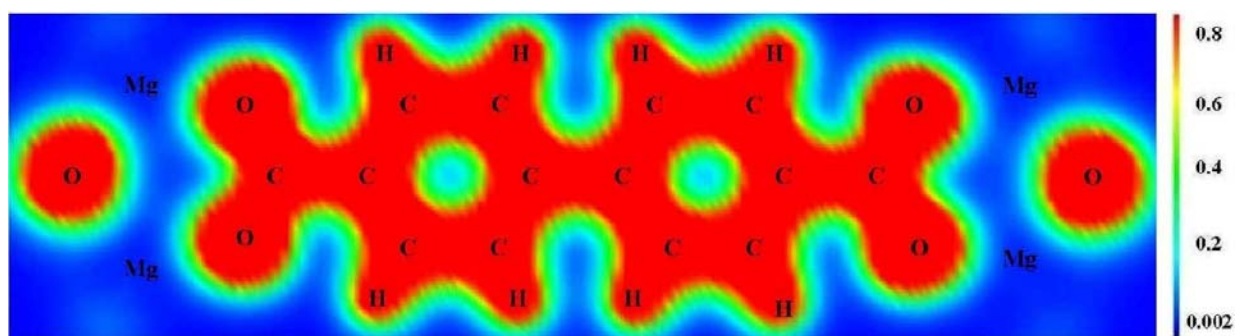

(a)

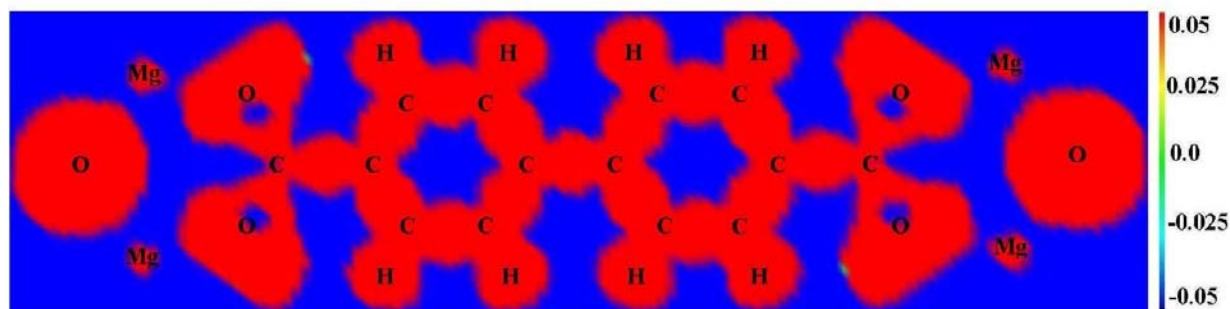

(b)

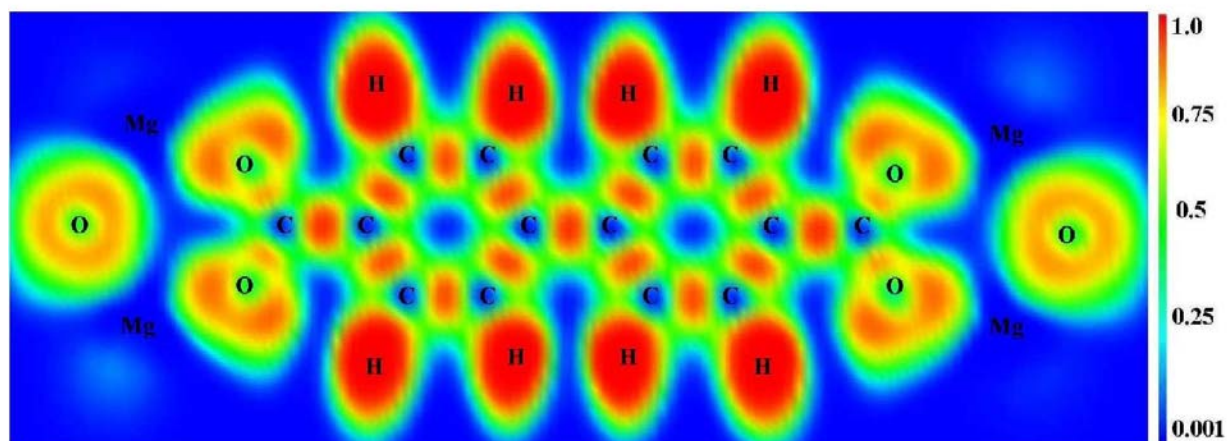

(c)

**Figure S3.** Calculated charge density (a), charge transfer (b), and electron localization function (c) plots for Mg-IRMOF-10 in the (110) plane.



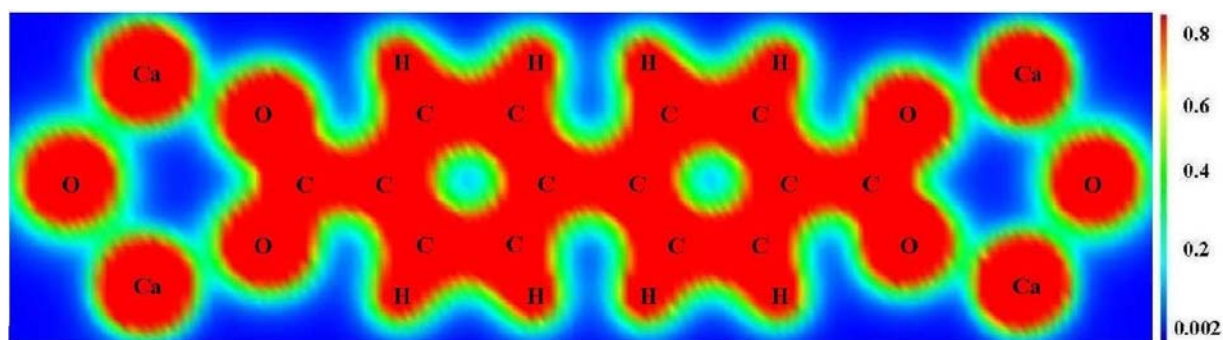

(a)

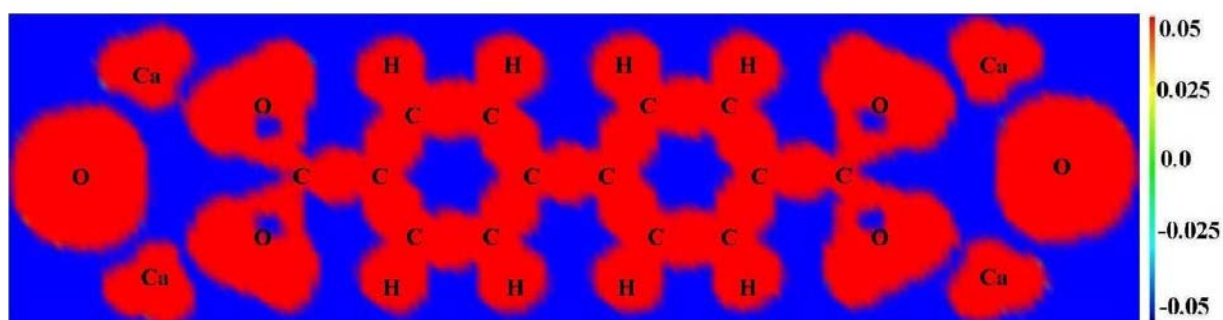

(b)

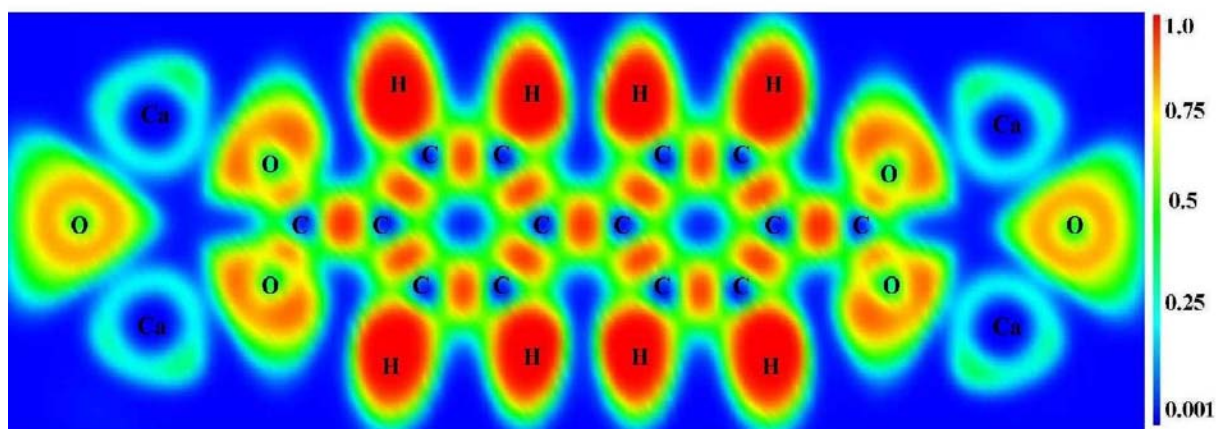

(c)

**Figure S4.** Calculated charge density (a), charge transfer (b), and electron localization function (c) plots for Ca-IRMOF-10 in the (110) plane.

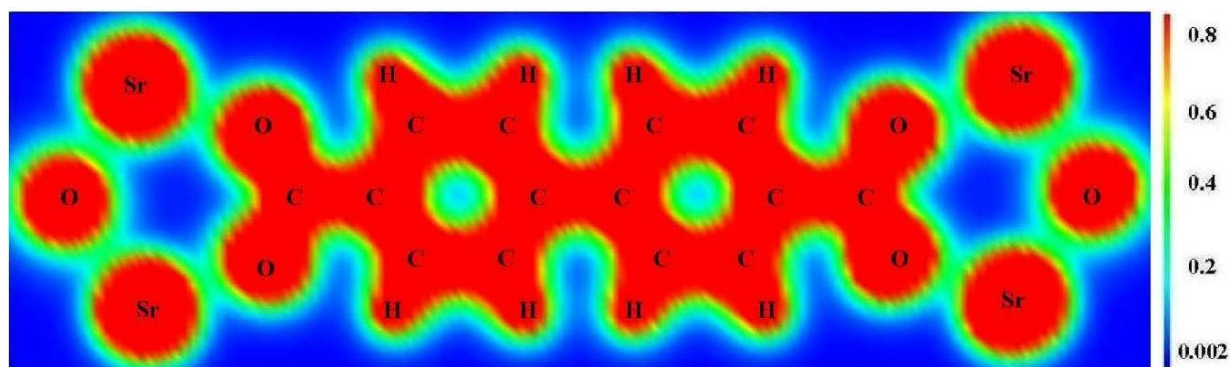

(a)

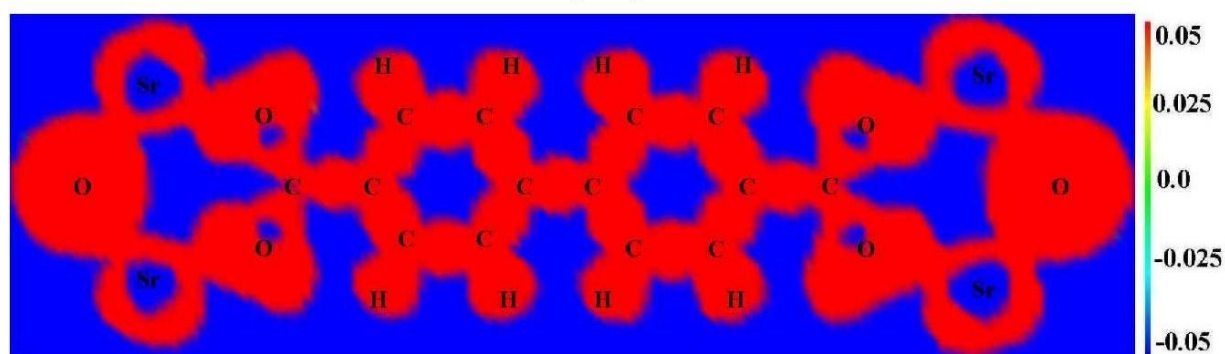

(b)

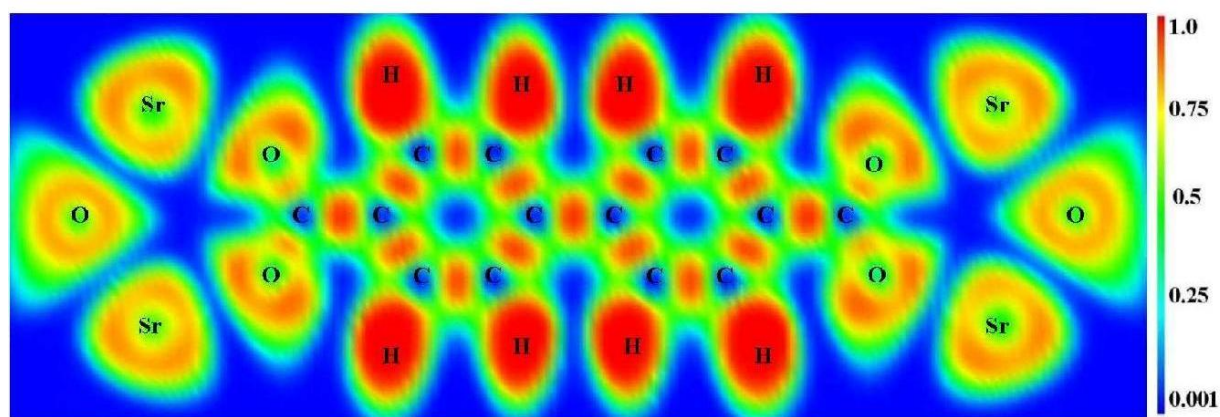

(c)

**Figure S5.** Calculated charge density (a), charge transfer (b), and electron localization function (c) plots for Sr-IRMOF-10 in the (110) plane.



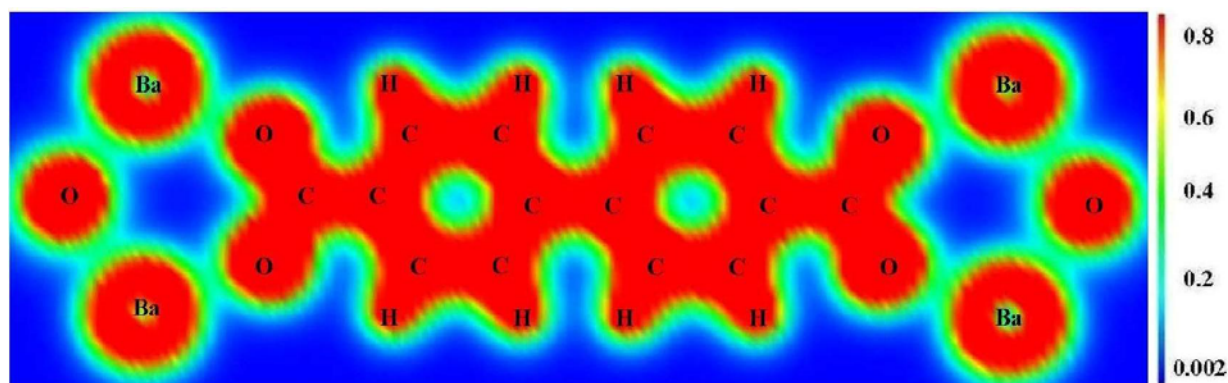

(a)

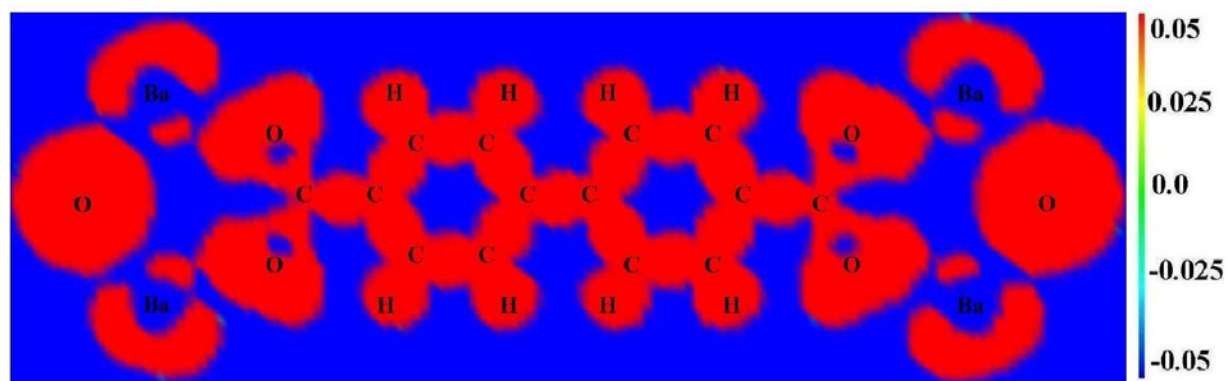

(b)

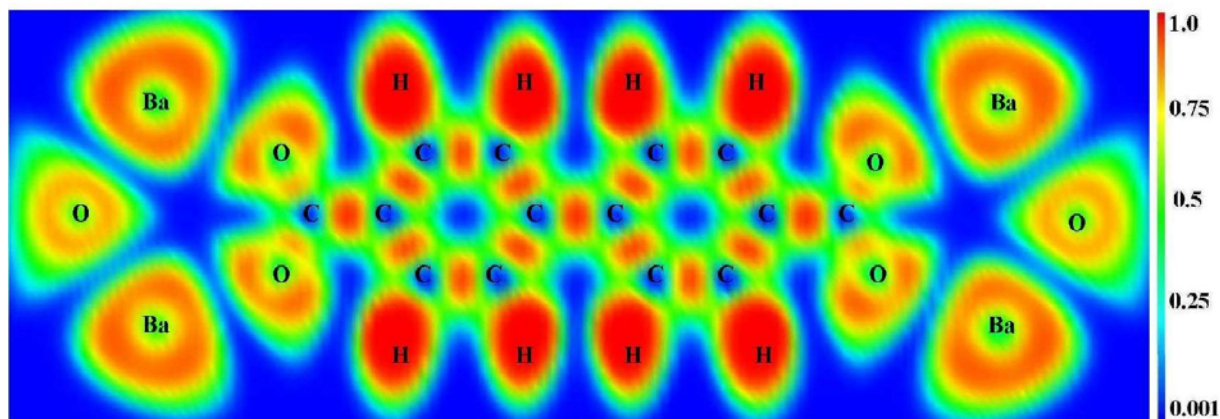

(c)

**Figure S6.** Calculated charge density (a), charge transfer (b), and electron localization function (c) plots for Ba-IRMOF-10 in the (110) plane.



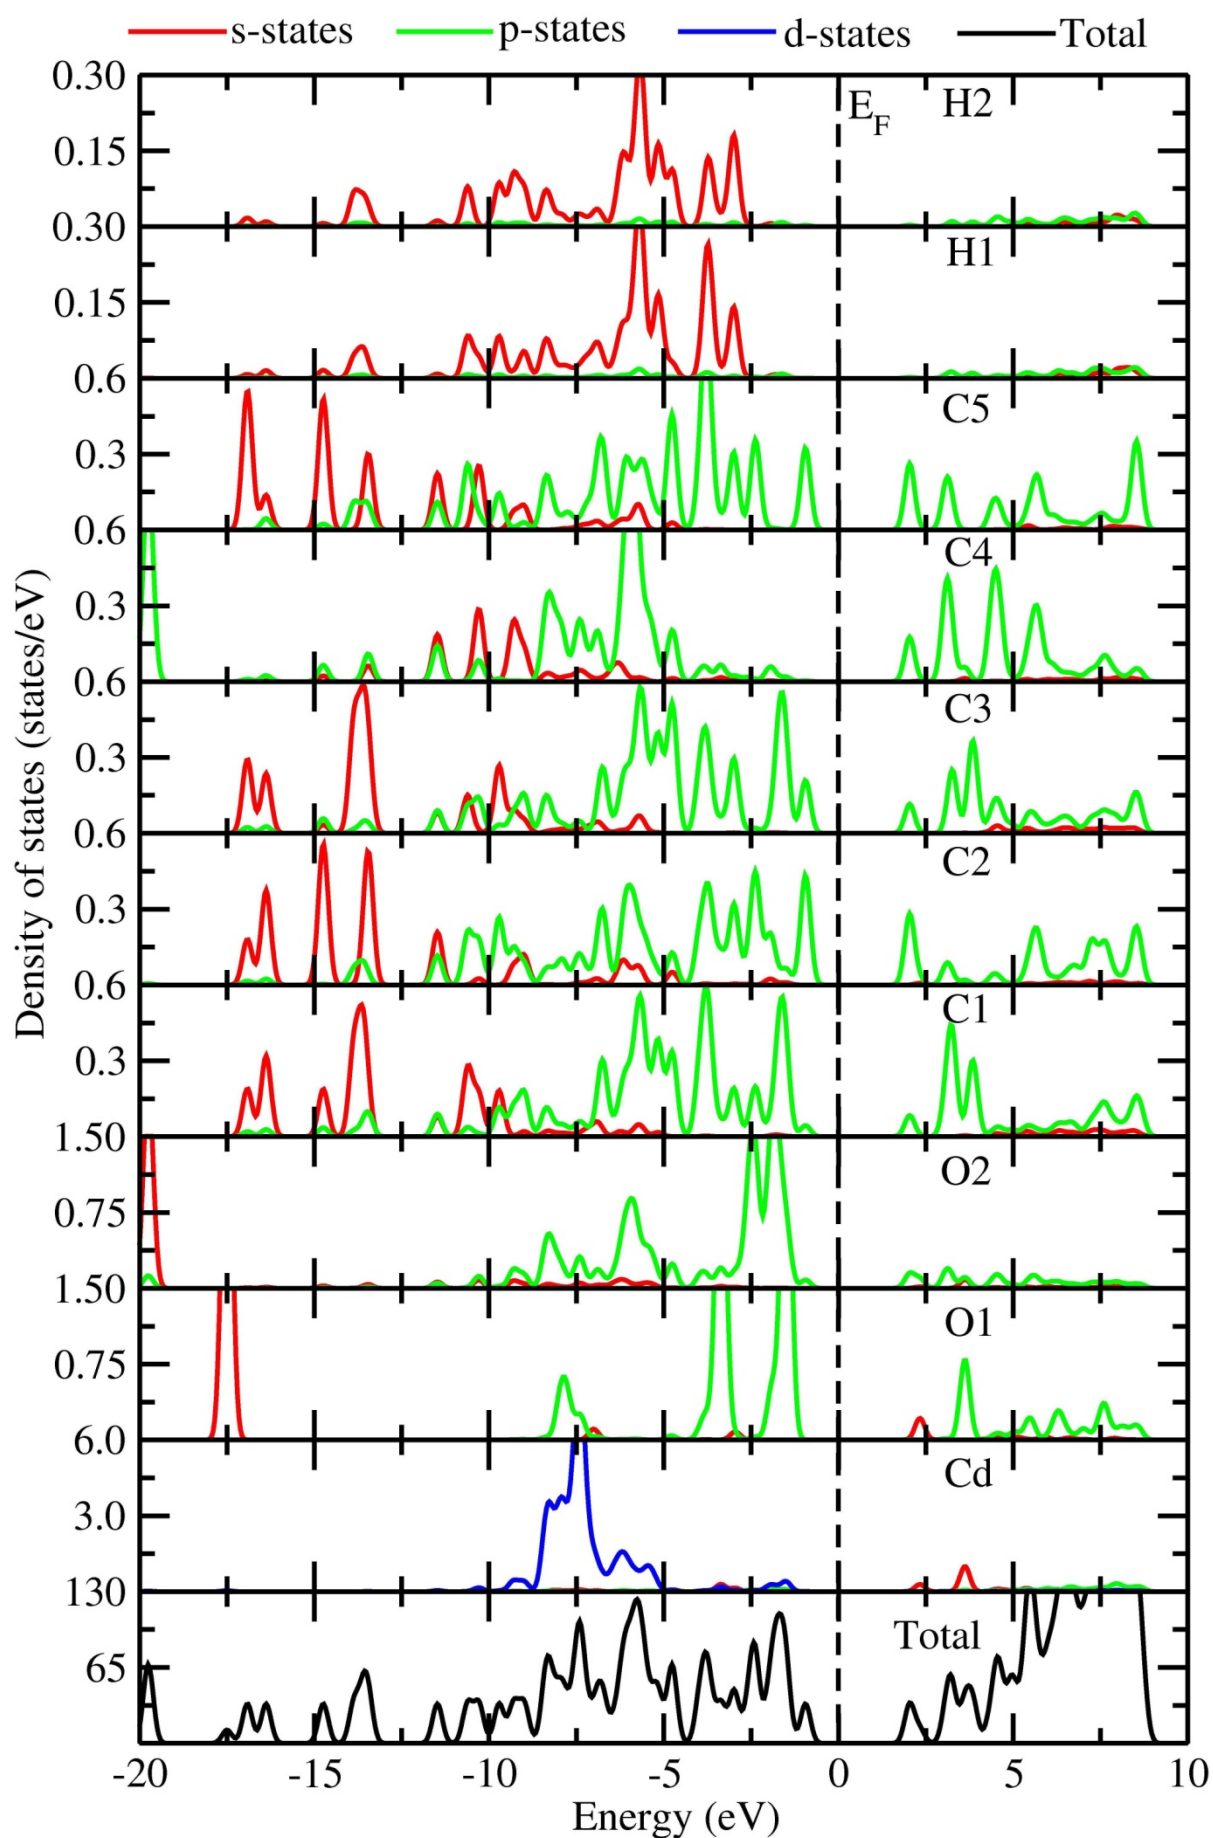

**Figure S7.** The calculated total density of states (TDOS) and partial density of states (PDOS) for Cd-IRMOF-10 in the cubic  $Fm-3m$  symmetry (no. 225)

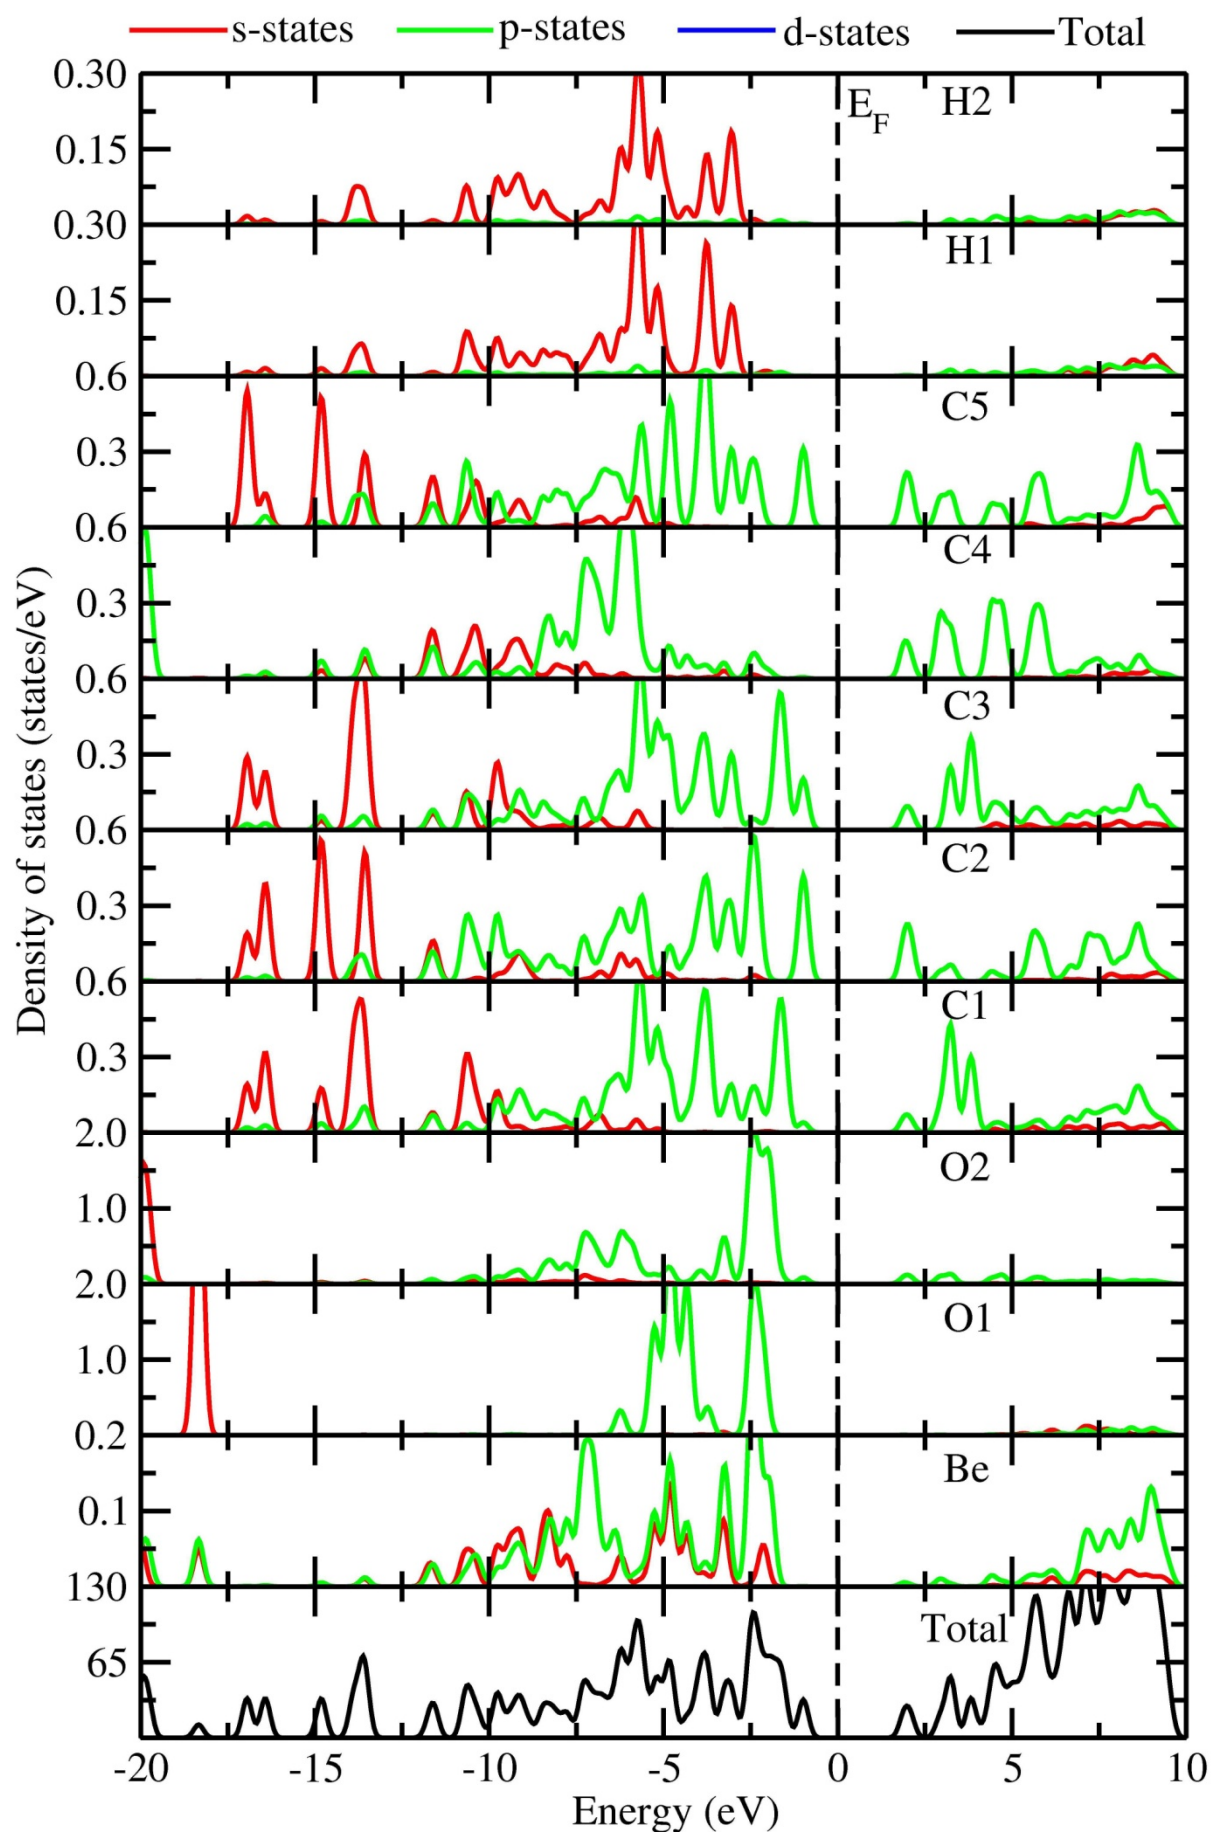

**Figure S8.** The calculated total density of states (TDOS) and partial density of states (PDOS) for Be-IRMOF-10 in the cubic  $Fm-3m$  symmetry (no. 225)

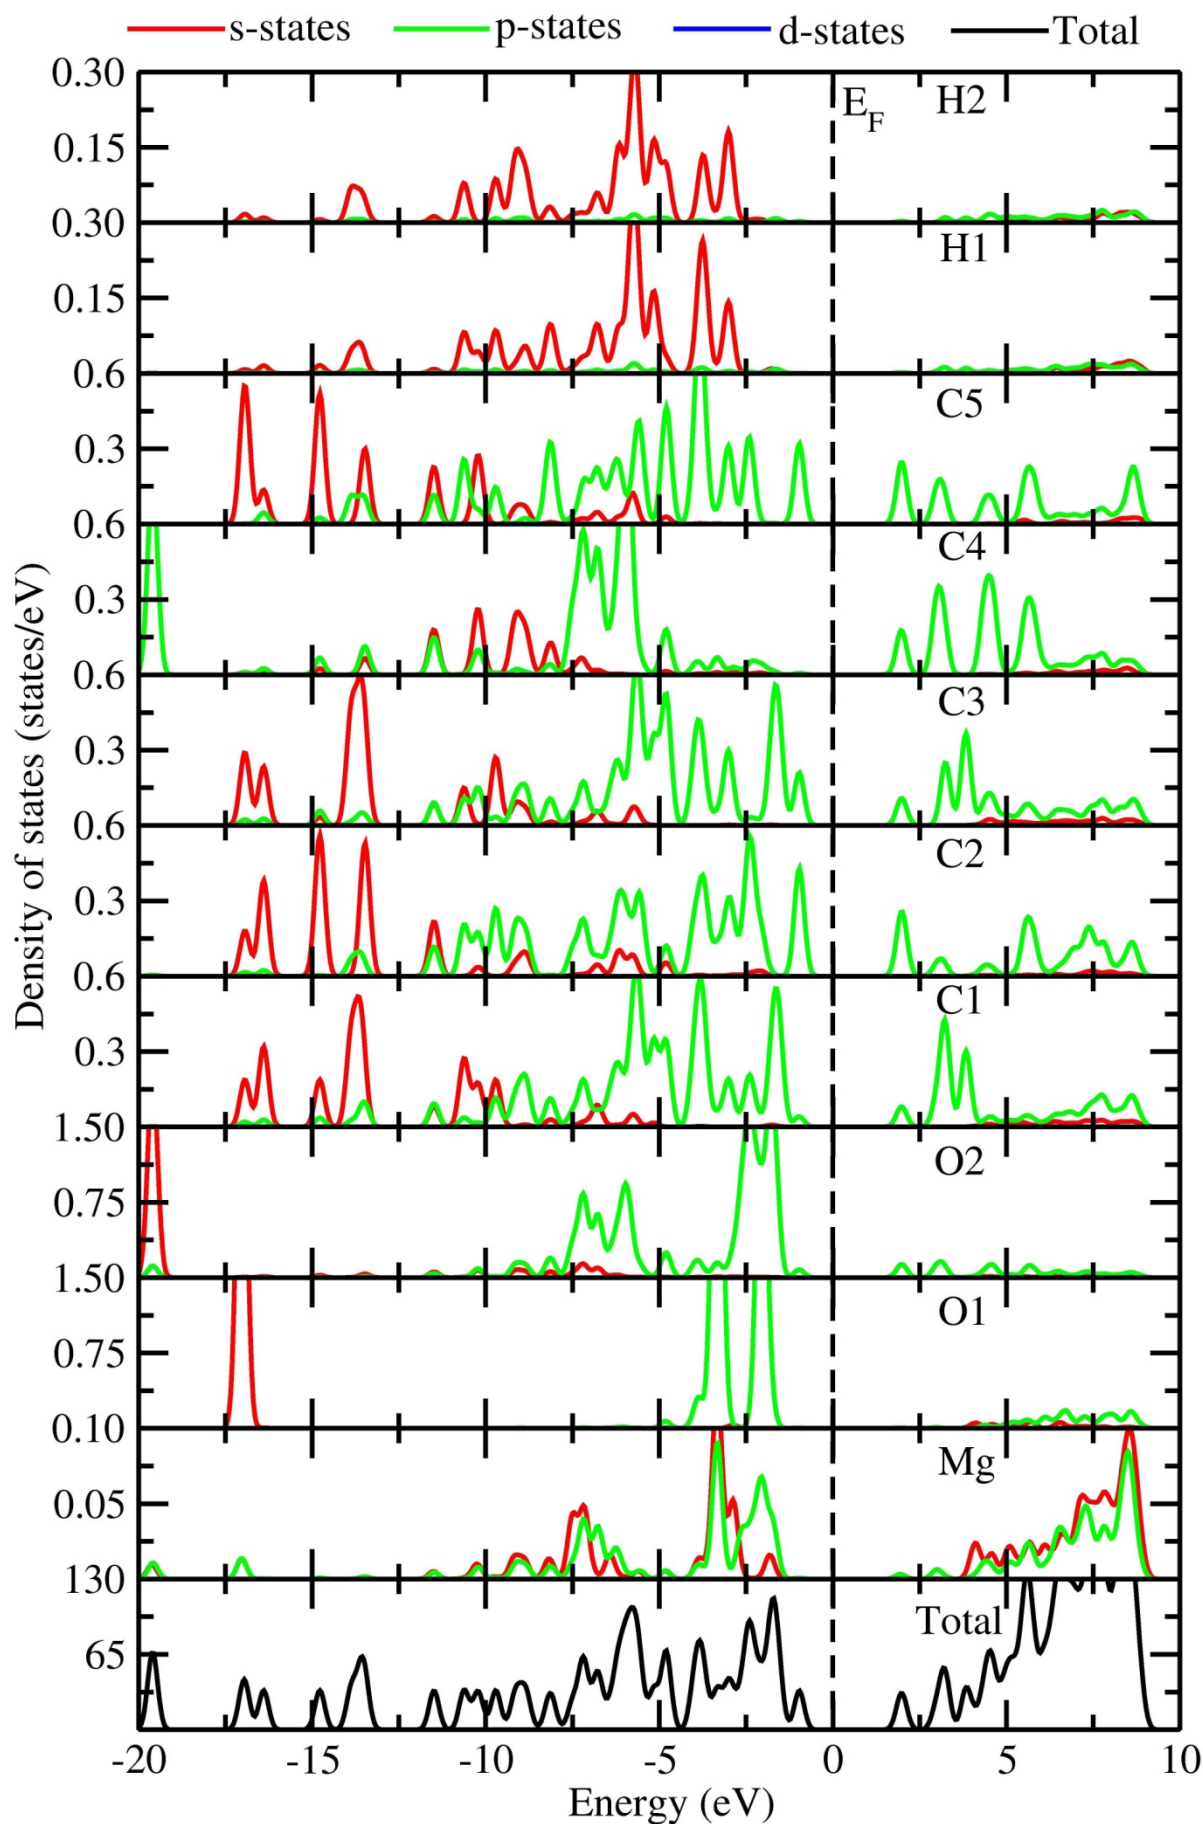

**Figure S9.** The calculated total density of states (TDOS) and partial density of states (PDOS) for Mg-IRMOF-10 in the cubic  $Fm-3m$  symmetry (no. 225)



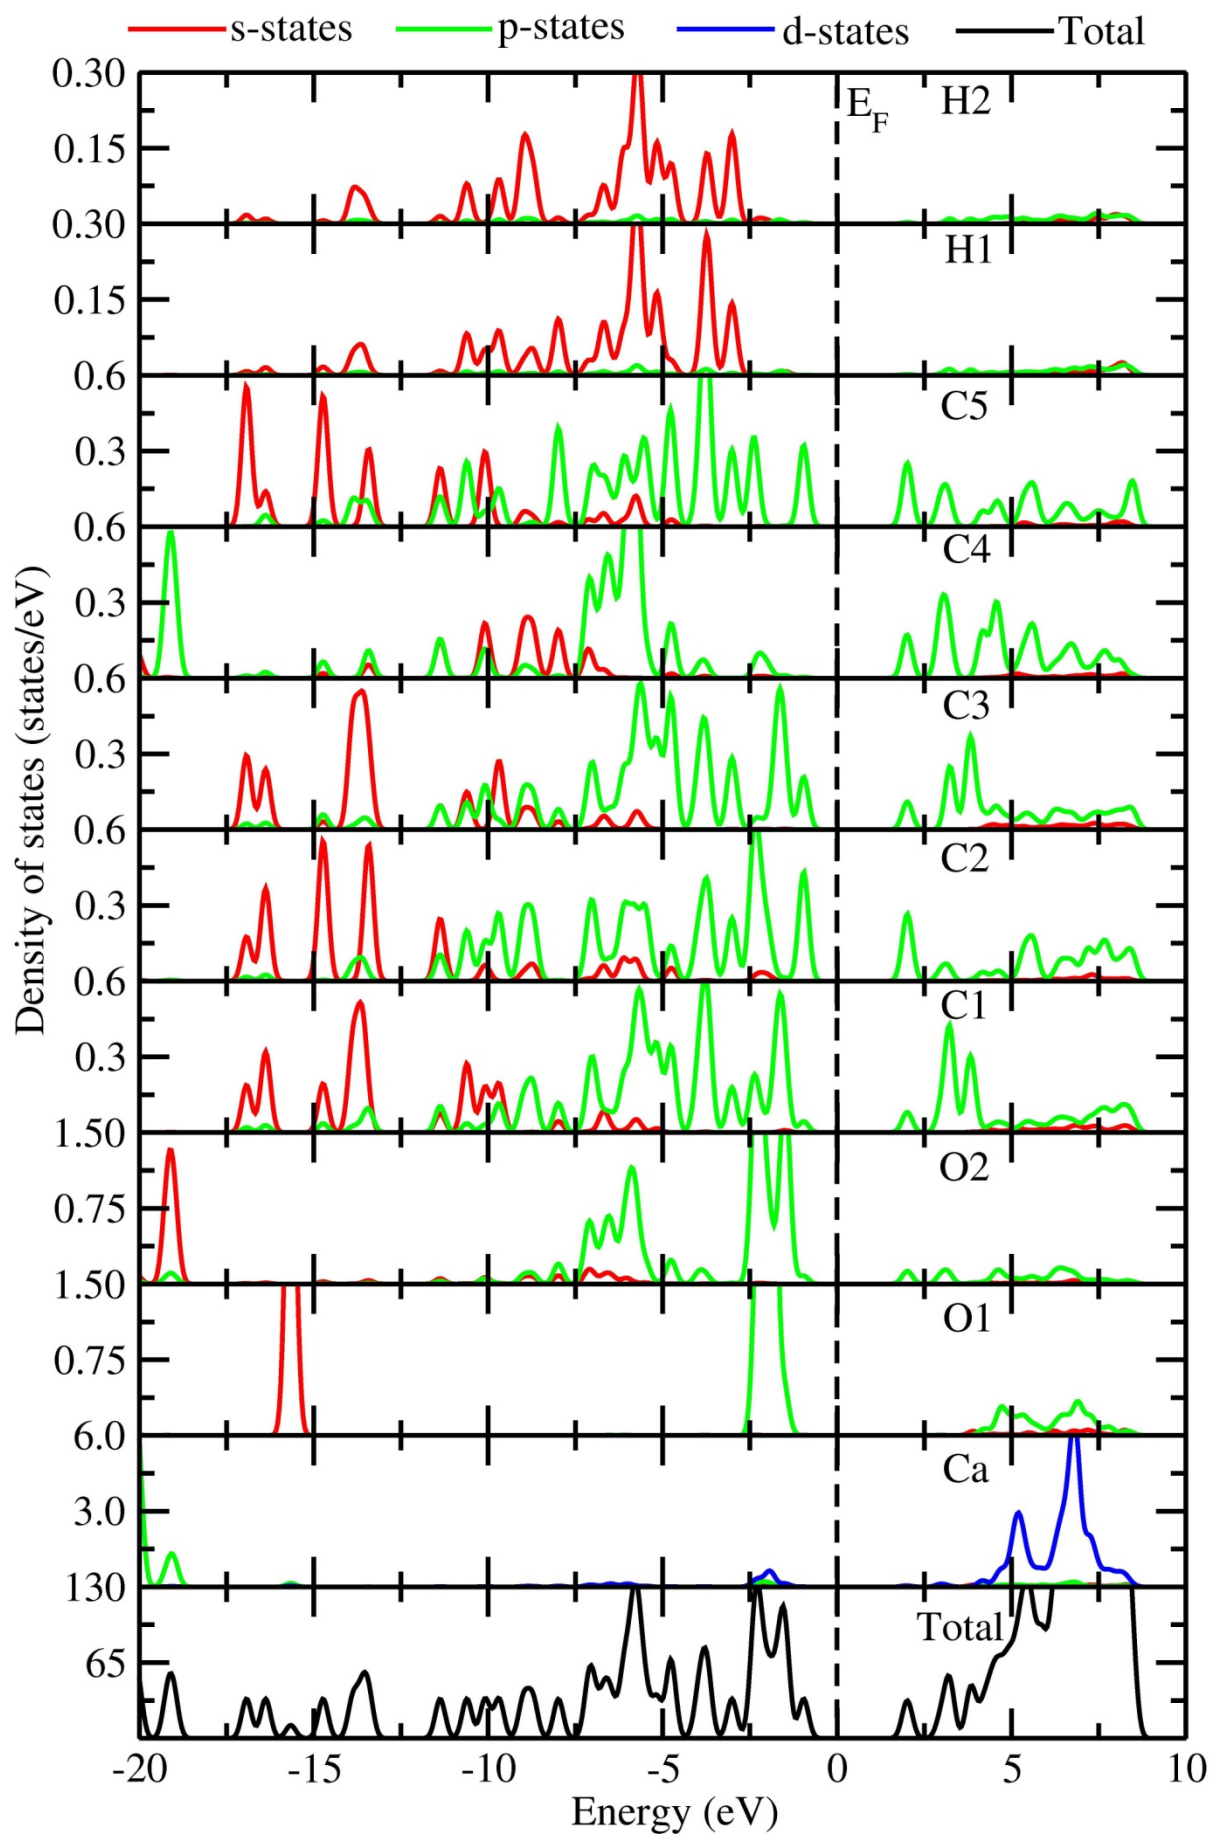

**Figure S10.** The calculated total density of states (TDOS) and partial density of states (PDOS) for Ca-IRMOF-10 in the cubic  $Fm-3m$  symmetry (no. 225)

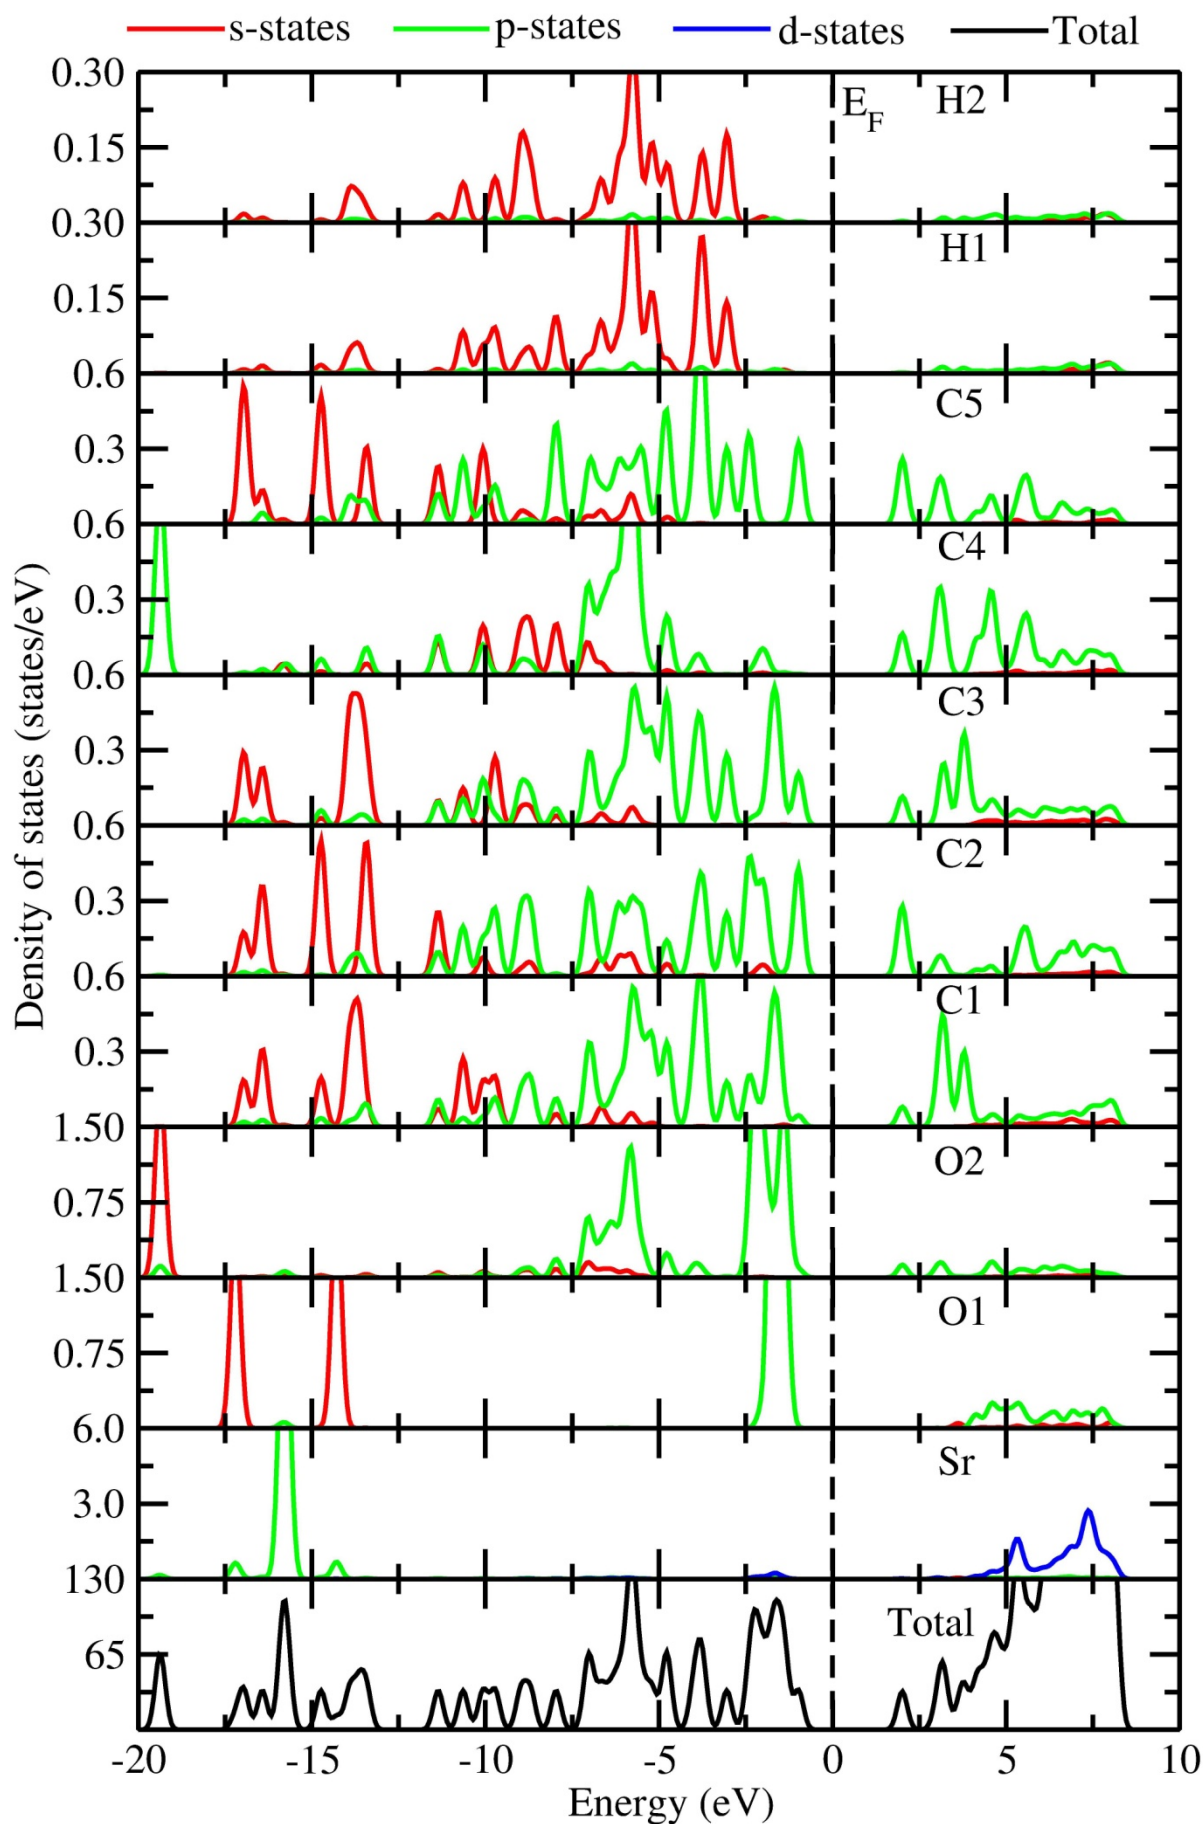

**Figure S11.** The calculated total density of states (TDOS) and partial density of states (PDOS) for Sr-IRMOF-10 in the cubic  $Fm-3m$  symmetry (no. 225)

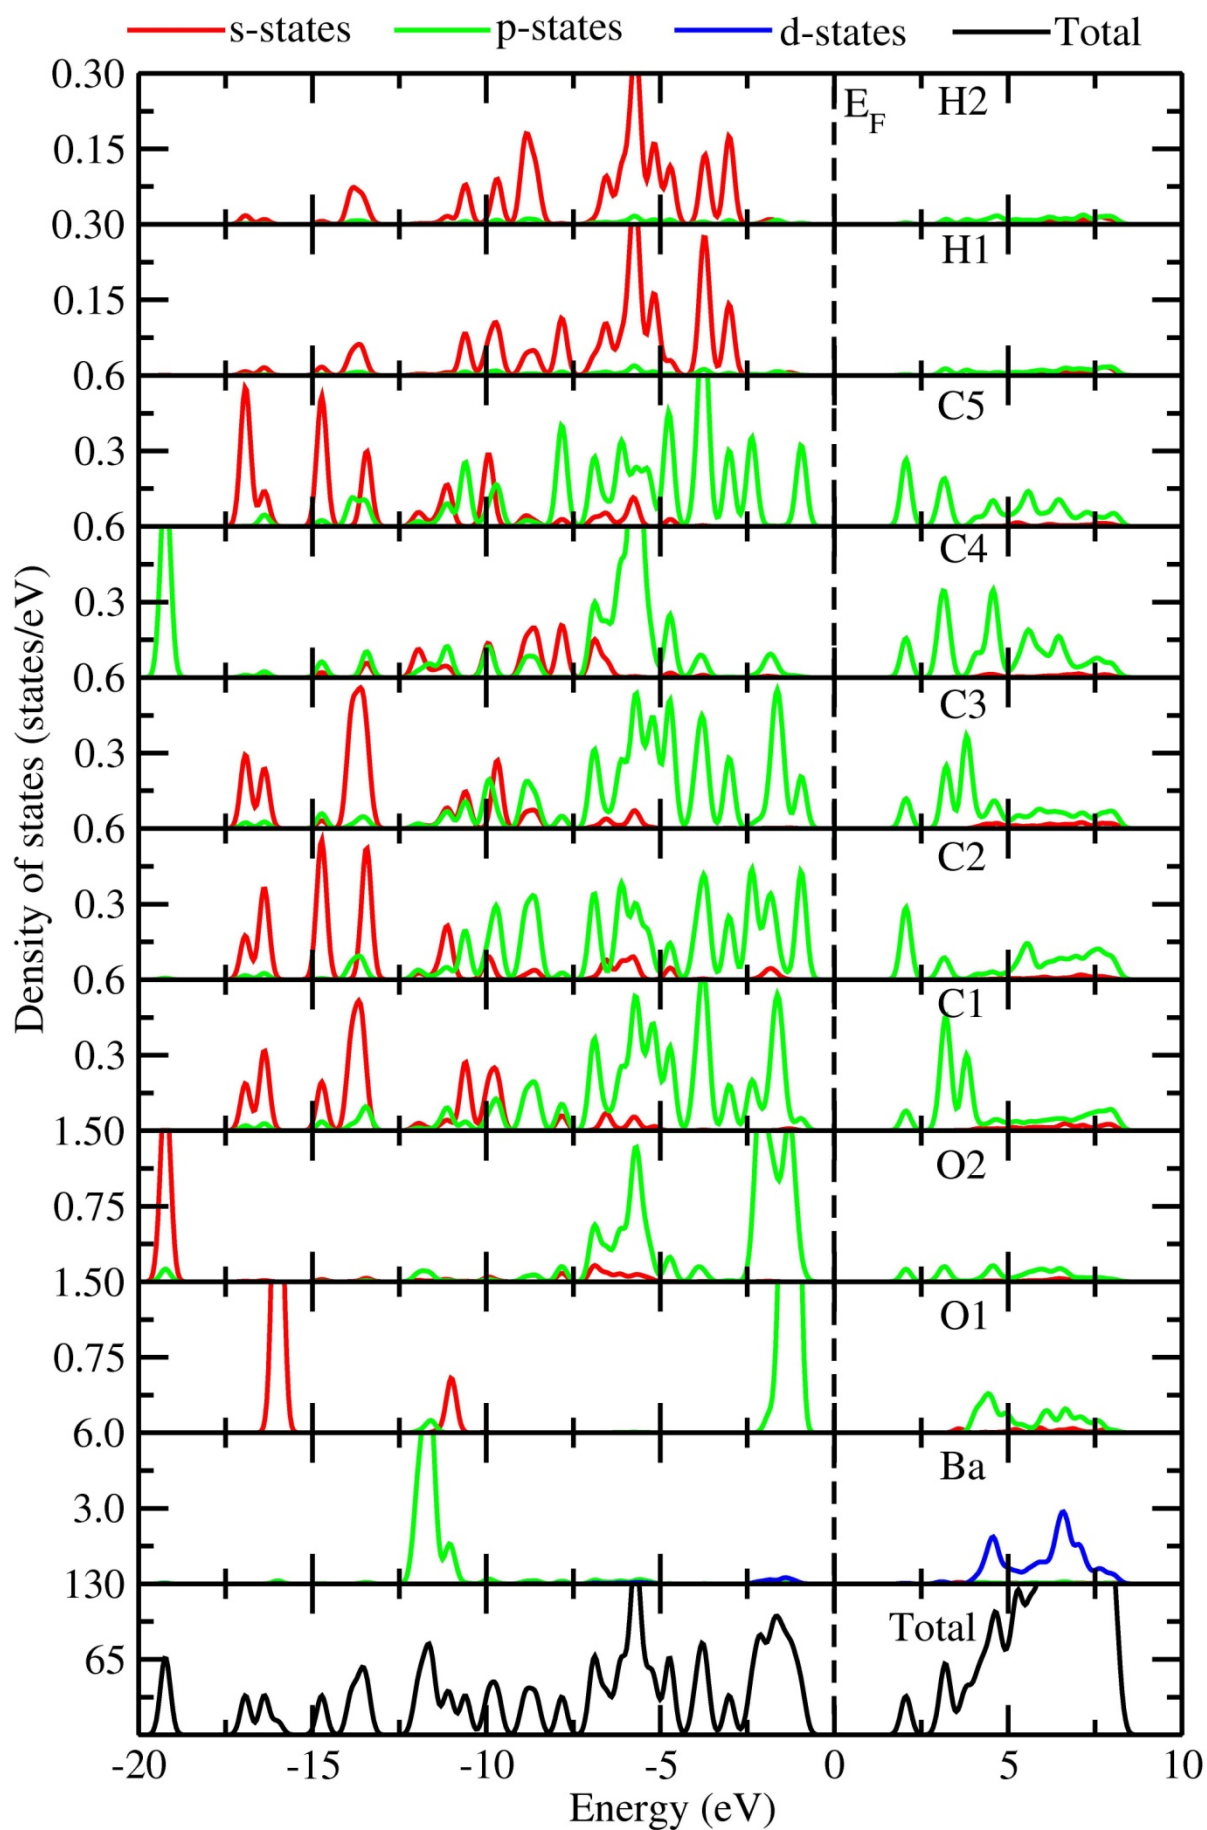

**Figure S12.** The calculated total density of states (TDOS) and partial density of states (PDOS) for Ba-IRMOF-10 in the cubic  $Fm-3m$  symmetry (no. 225)



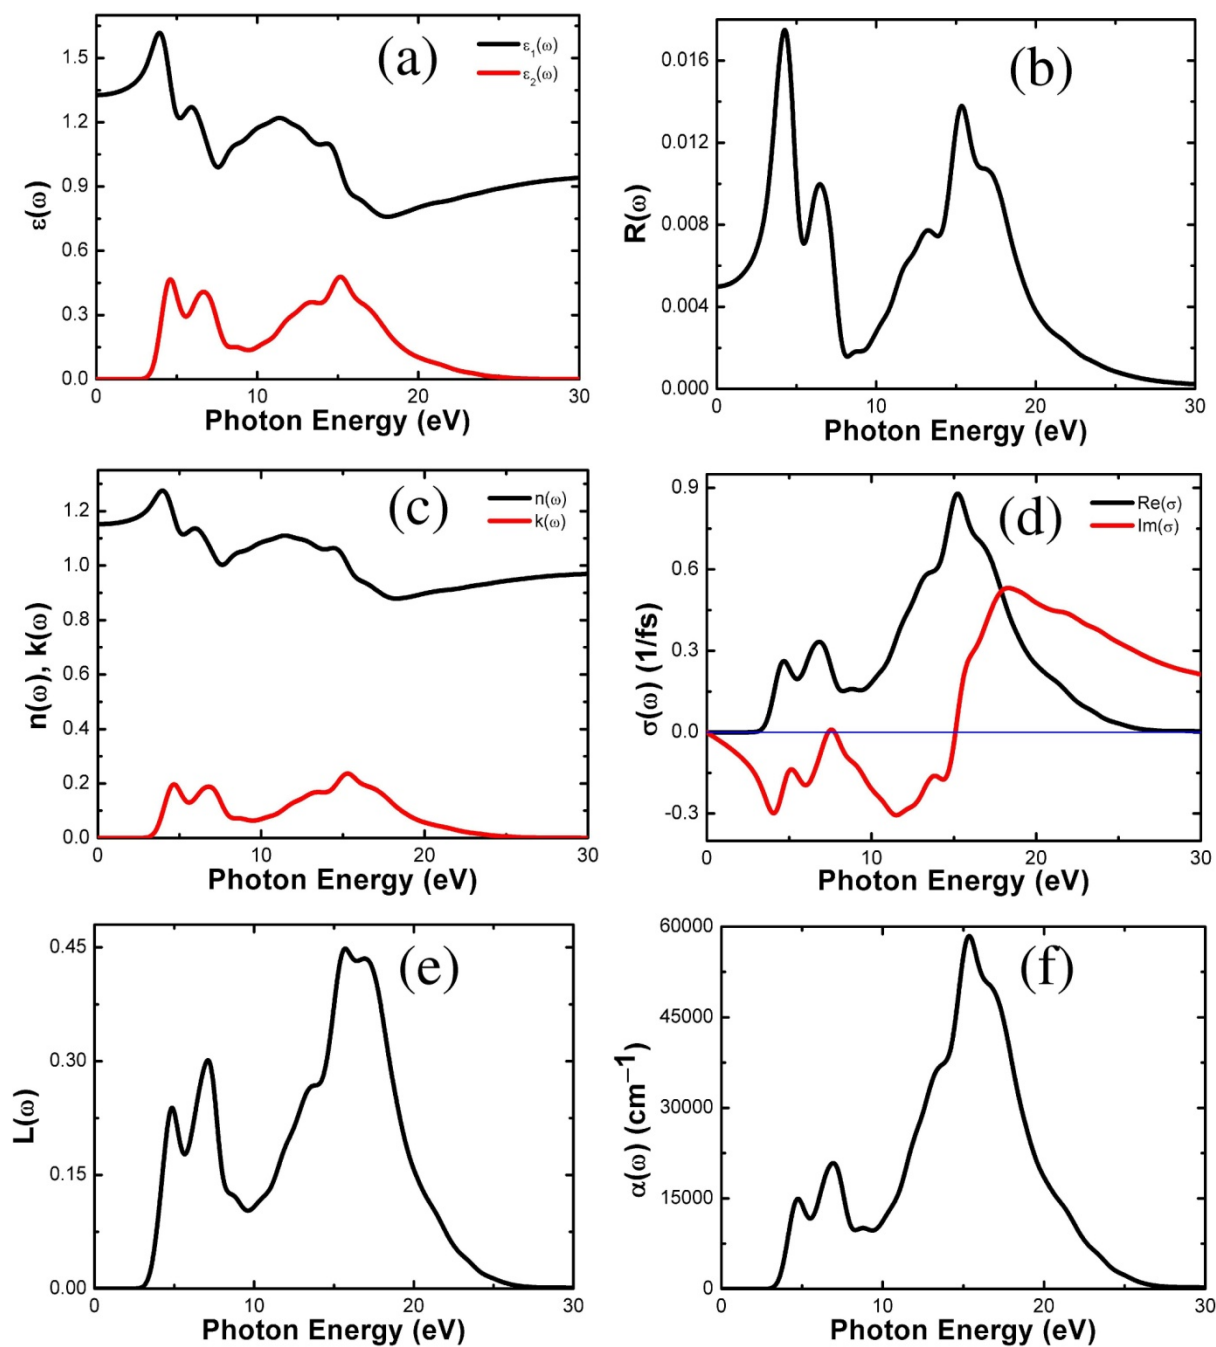

**Figure S13.** Calculated optical properties for Cd-IRMOF-10: (a) dielectric function  $\epsilon(\omega)$ , (b) reflectivity  $R(\omega)$ , (c) refractive index  $n(\omega)$ ; extinction coefficient  $k(\omega)$ , (d) optical conductivity  $\sigma(\omega)$ , (e) energy loss function  $L(\omega)$ , (f) absorption  $\alpha(\omega)$ .

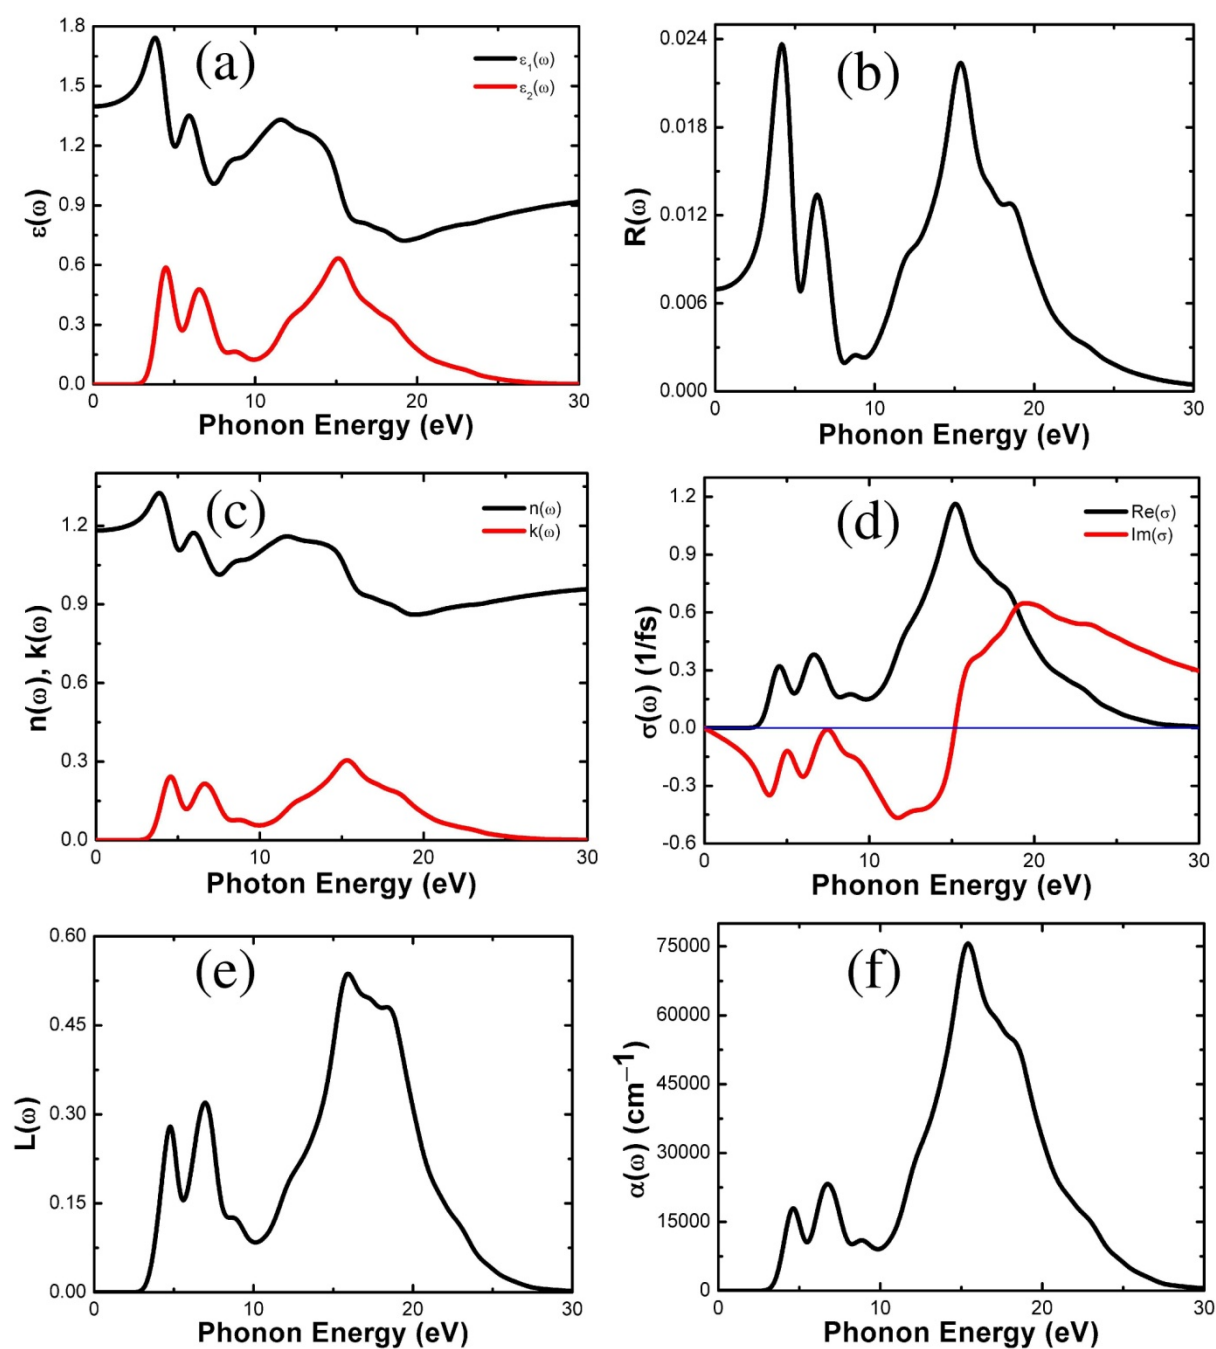

**Figure S14.** Calculated optical properties for Be-IRMOF-10: (a) dielectric function  $\epsilon(\omega)$ , (b) reflectivity  $R(\omega)$ , (c) refractive index  $n(\omega)$ ; extinction coefficient  $k(\omega)$ , (d) optical conductivity  $\sigma(\omega)$ , (e) energy loss function  $L(\omega)$ , (f) absorption  $\alpha(\omega)$ .

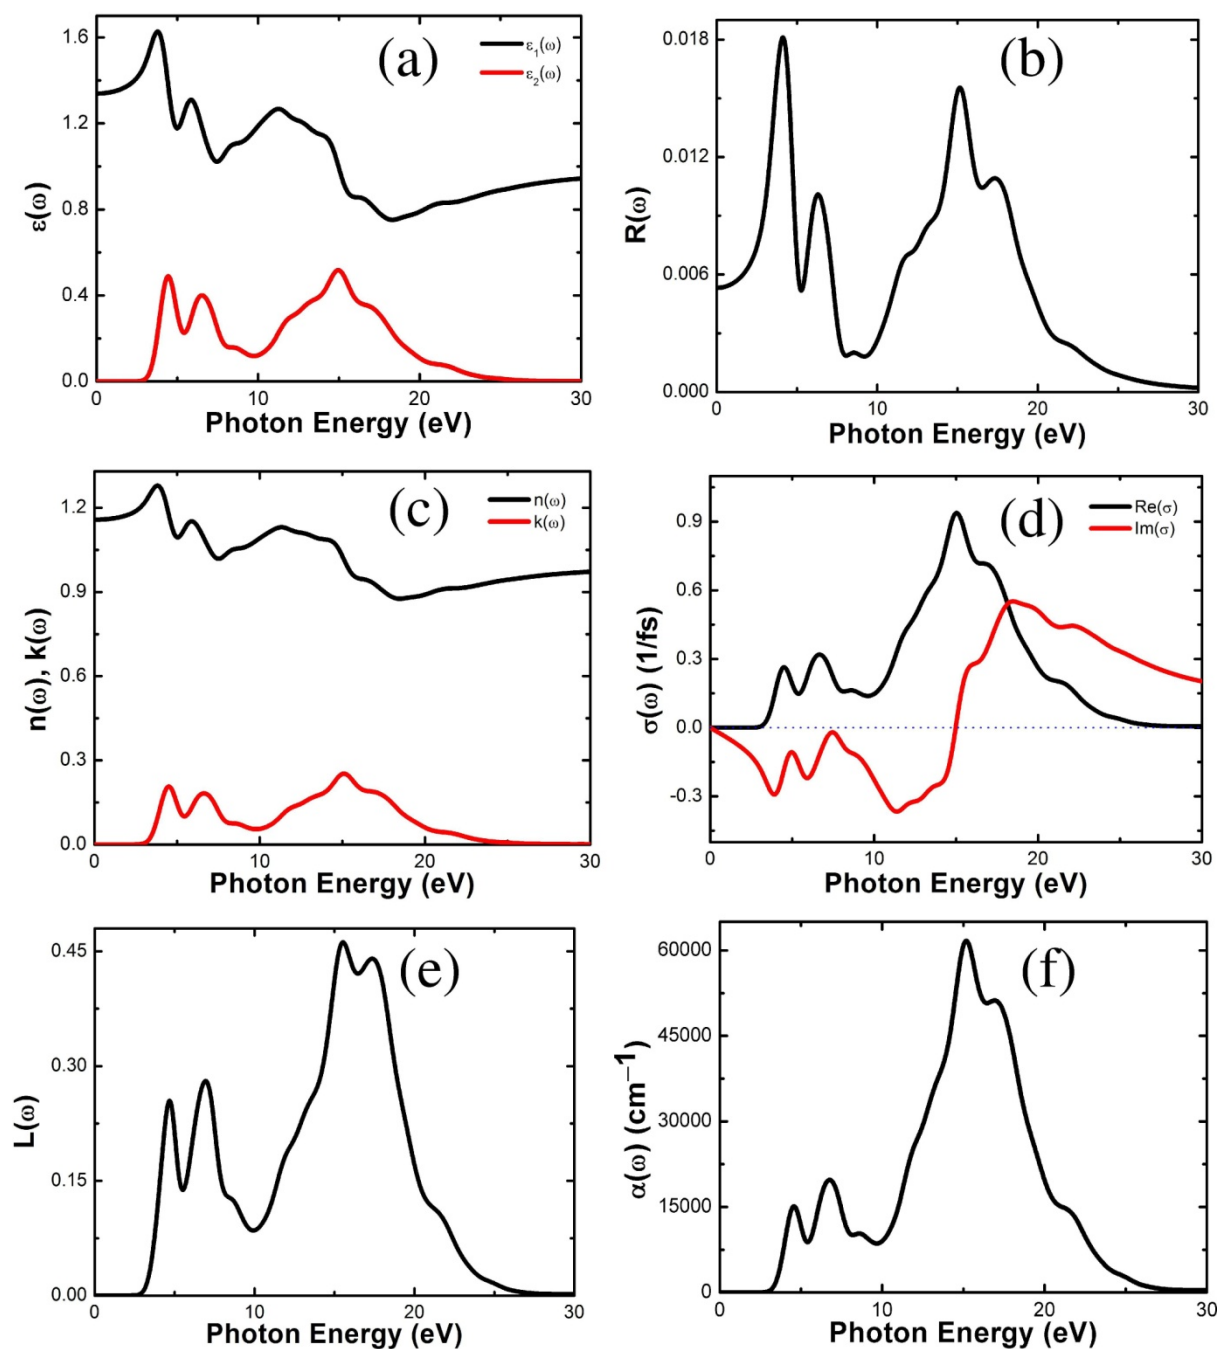

**Figure S15.** Calculated optical properties for Mg-IRMOF-10: (a) dielectric function  $\epsilon(\omega)$ , (b) reflectivity  $R(\omega)$ , (c) refractive index  $n(\omega)$ ; extinction coefficient  $k(\omega)$ , (d) optical conductivity  $\sigma(\omega)$ , (e) energy loss function  $L(\omega)$ , (f) absorption  $\alpha(\omega)$ .



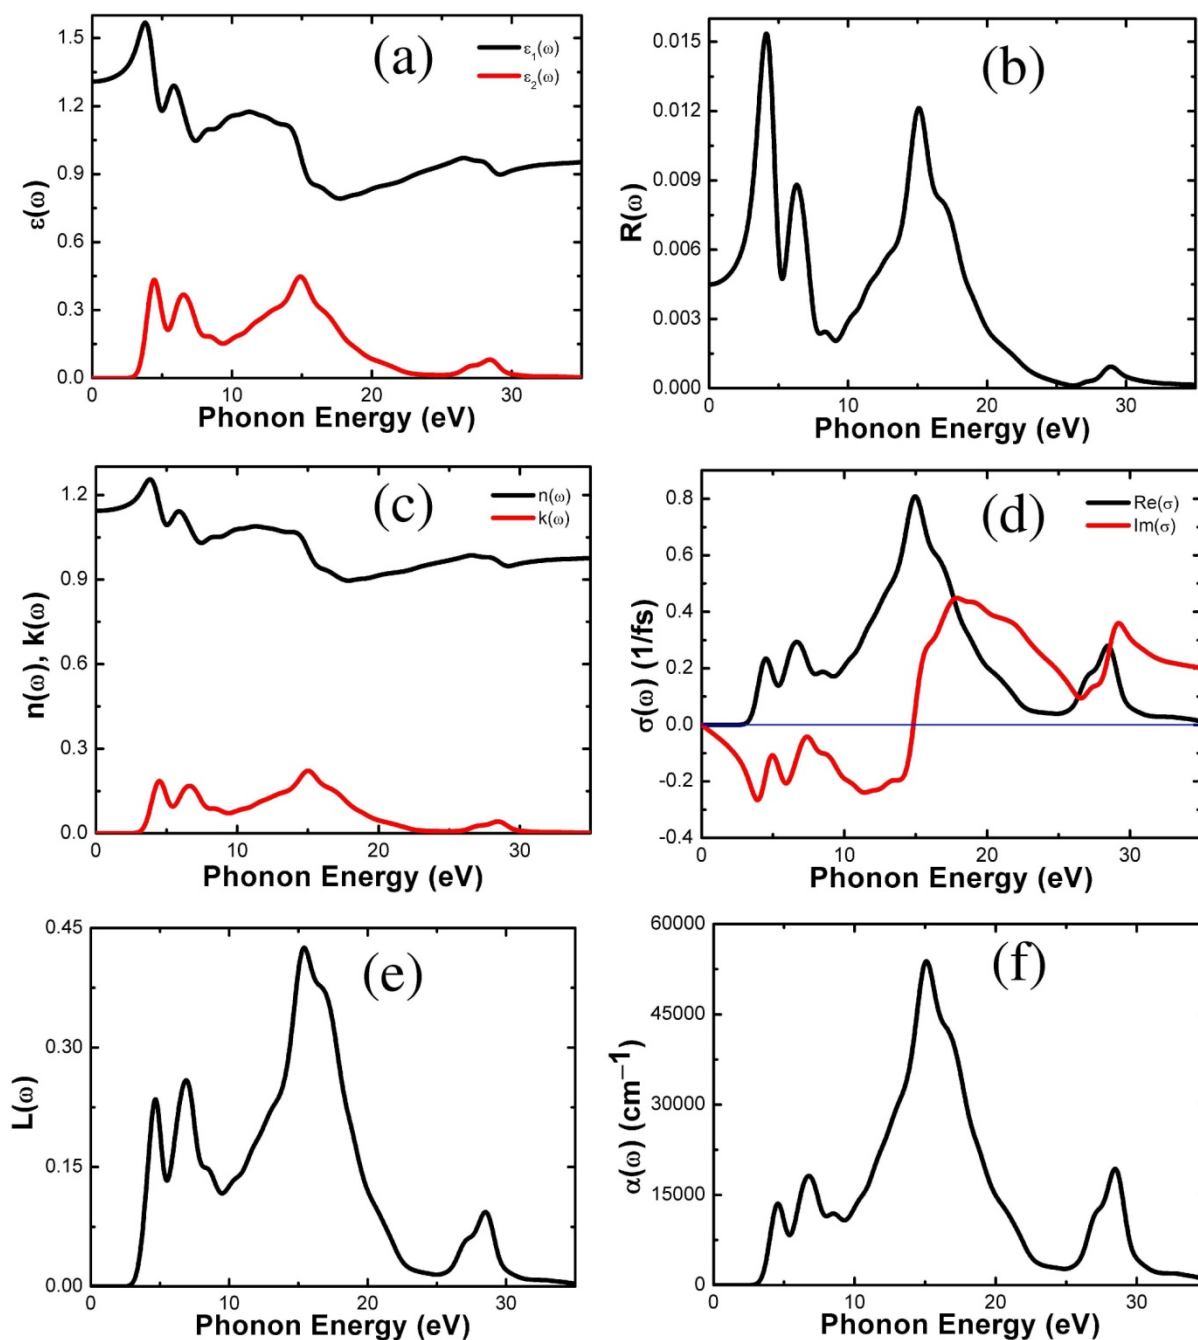

**Figure S16.** Calculated optical properties for Ca-IRMOF-10: (a) dielectric function  $\epsilon(\omega)$ , (b) reflectivity  $R(\omega)$ , (c) refractive index  $n(\omega)$ ; extinction coefficient  $k(\omega)$ , (d) optical conductivity  $\sigma(\omega)$ , (e) energy loss function  $L(\omega)$ , (f) absorption  $\alpha(\omega)$ .

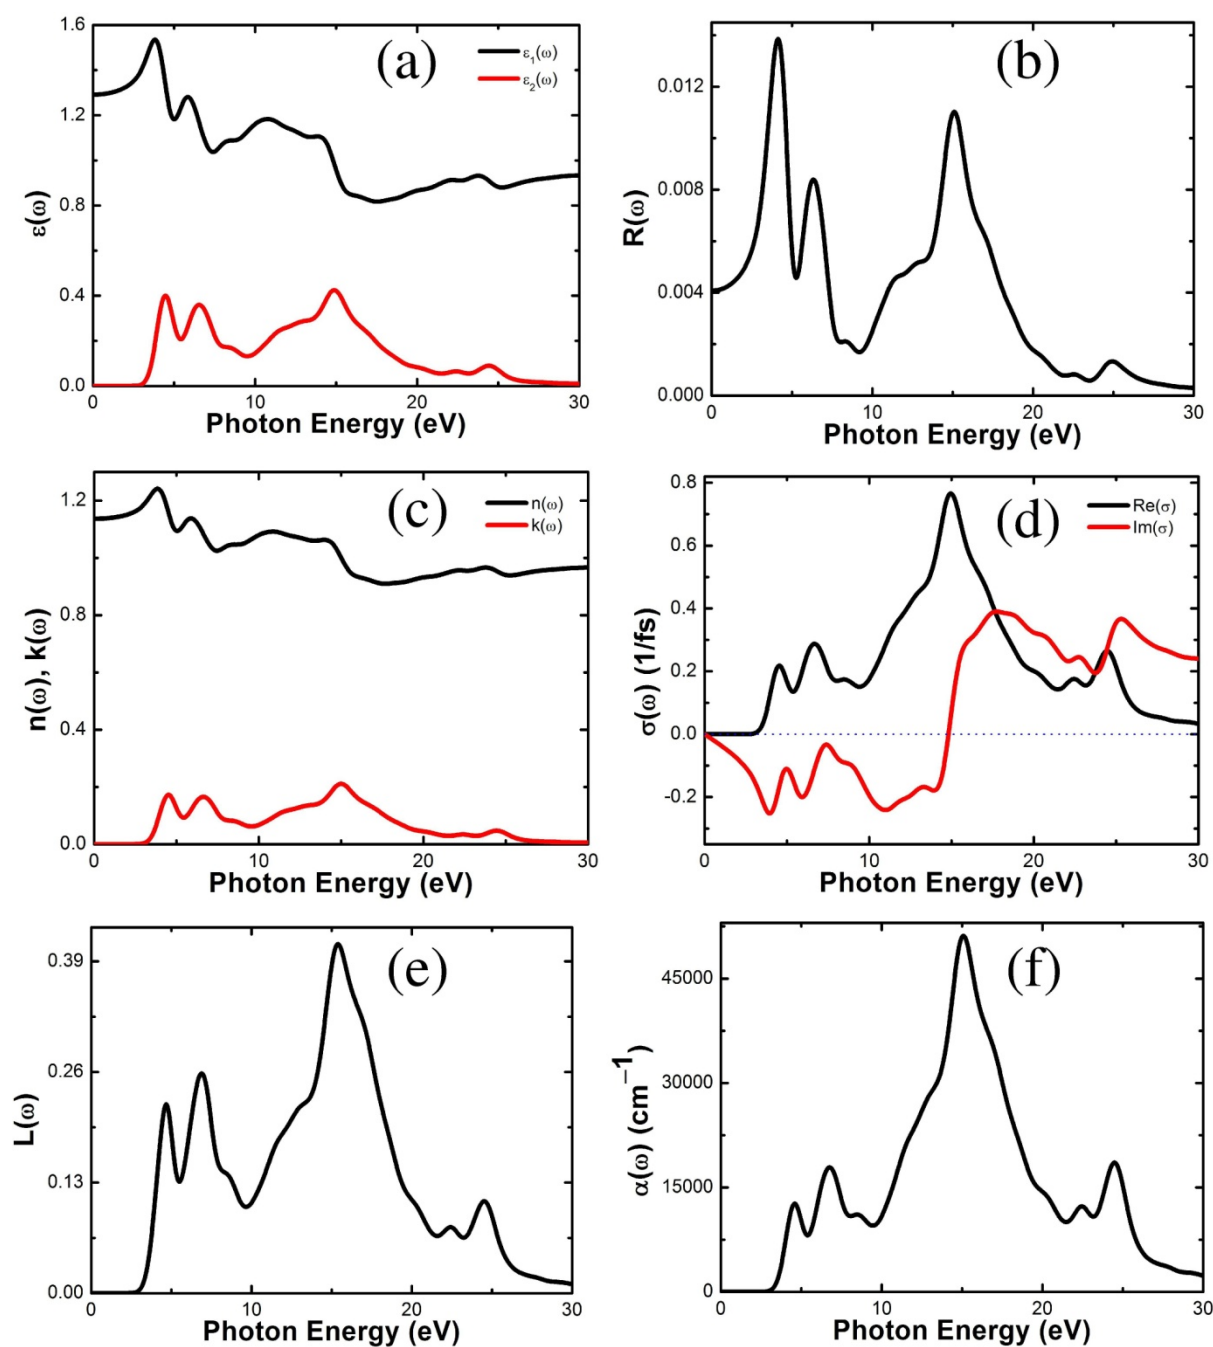

**Figure S17.** Calculated optical properties for Sr-IRMOF-10: (a) dielectric function  $\epsilon(\omega)$ , (b) reflectivity  $R(\omega)$ , (c) refractive index  $n(\omega)$ ; extinction coefficient  $k(\omega)$ , (d) optical conductivity  $\sigma(\omega)$ , (e) energy loss function  $L(\omega)$ , (f) absorption  $\alpha(\omega)$ .

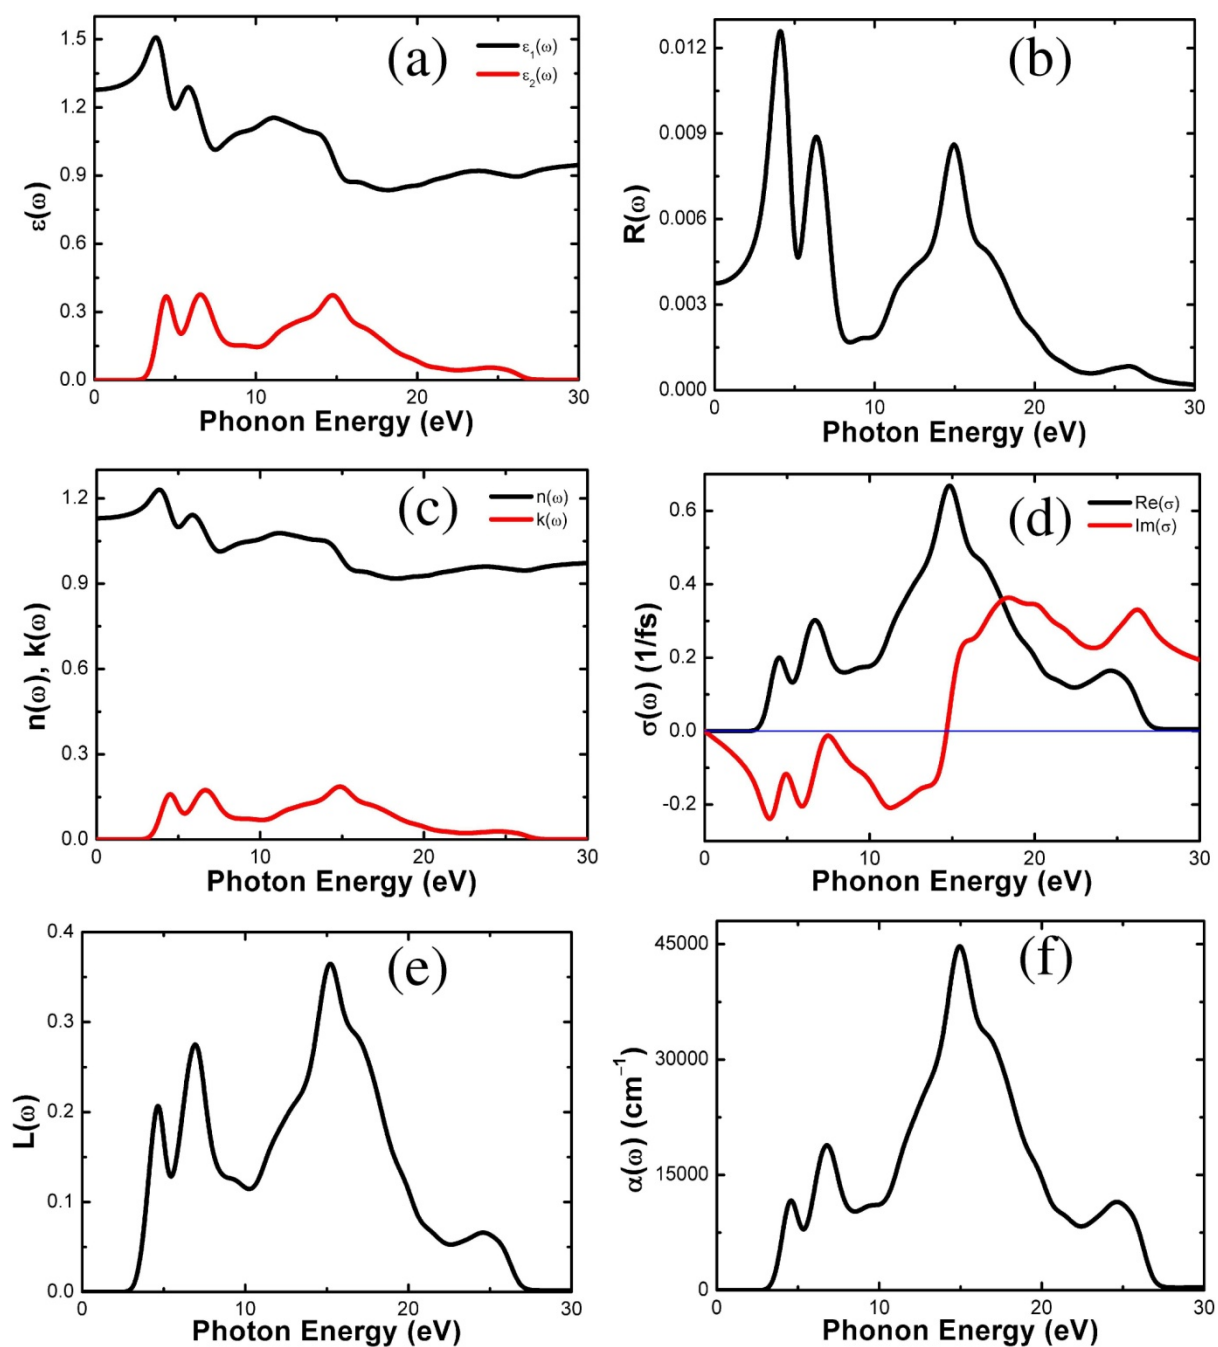

**Figure S18.** Calculated optical properties for Ba-IRMOF-10: (a) dielectric function  $\epsilon(\omega)$ , (b) reflectivity  $R(\omega)$ , (c) refractive index  $n(\omega)$ ; extinction coefficient  $k(\omega)$ , (d) optical conductivity  $\sigma(\omega)$ , (e) energy loss function  $L(\omega)$ , (f) absorption  $\alpha(\omega)$ .

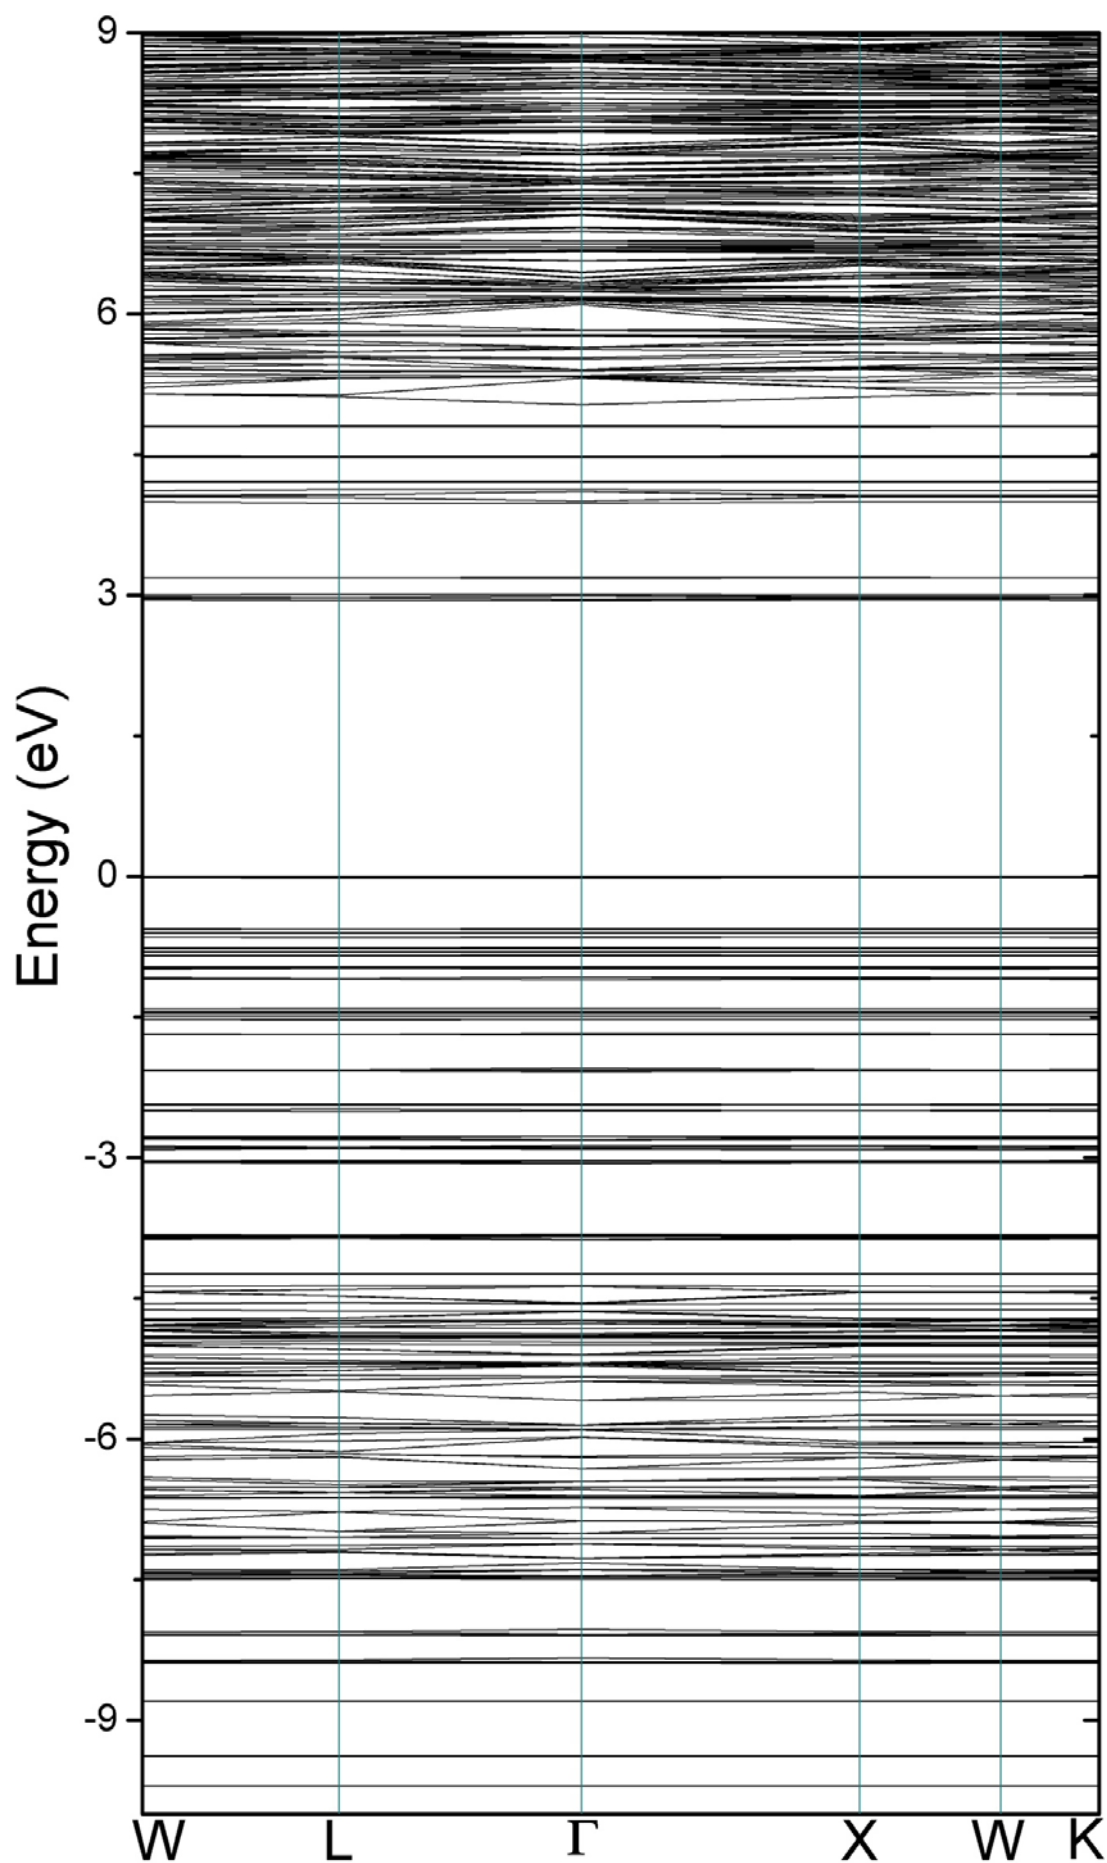

**Figure S19.** The electronic band structure of Cd-IRMOF-10. The Fermi level is set to zero and placed in the valence band maximum.



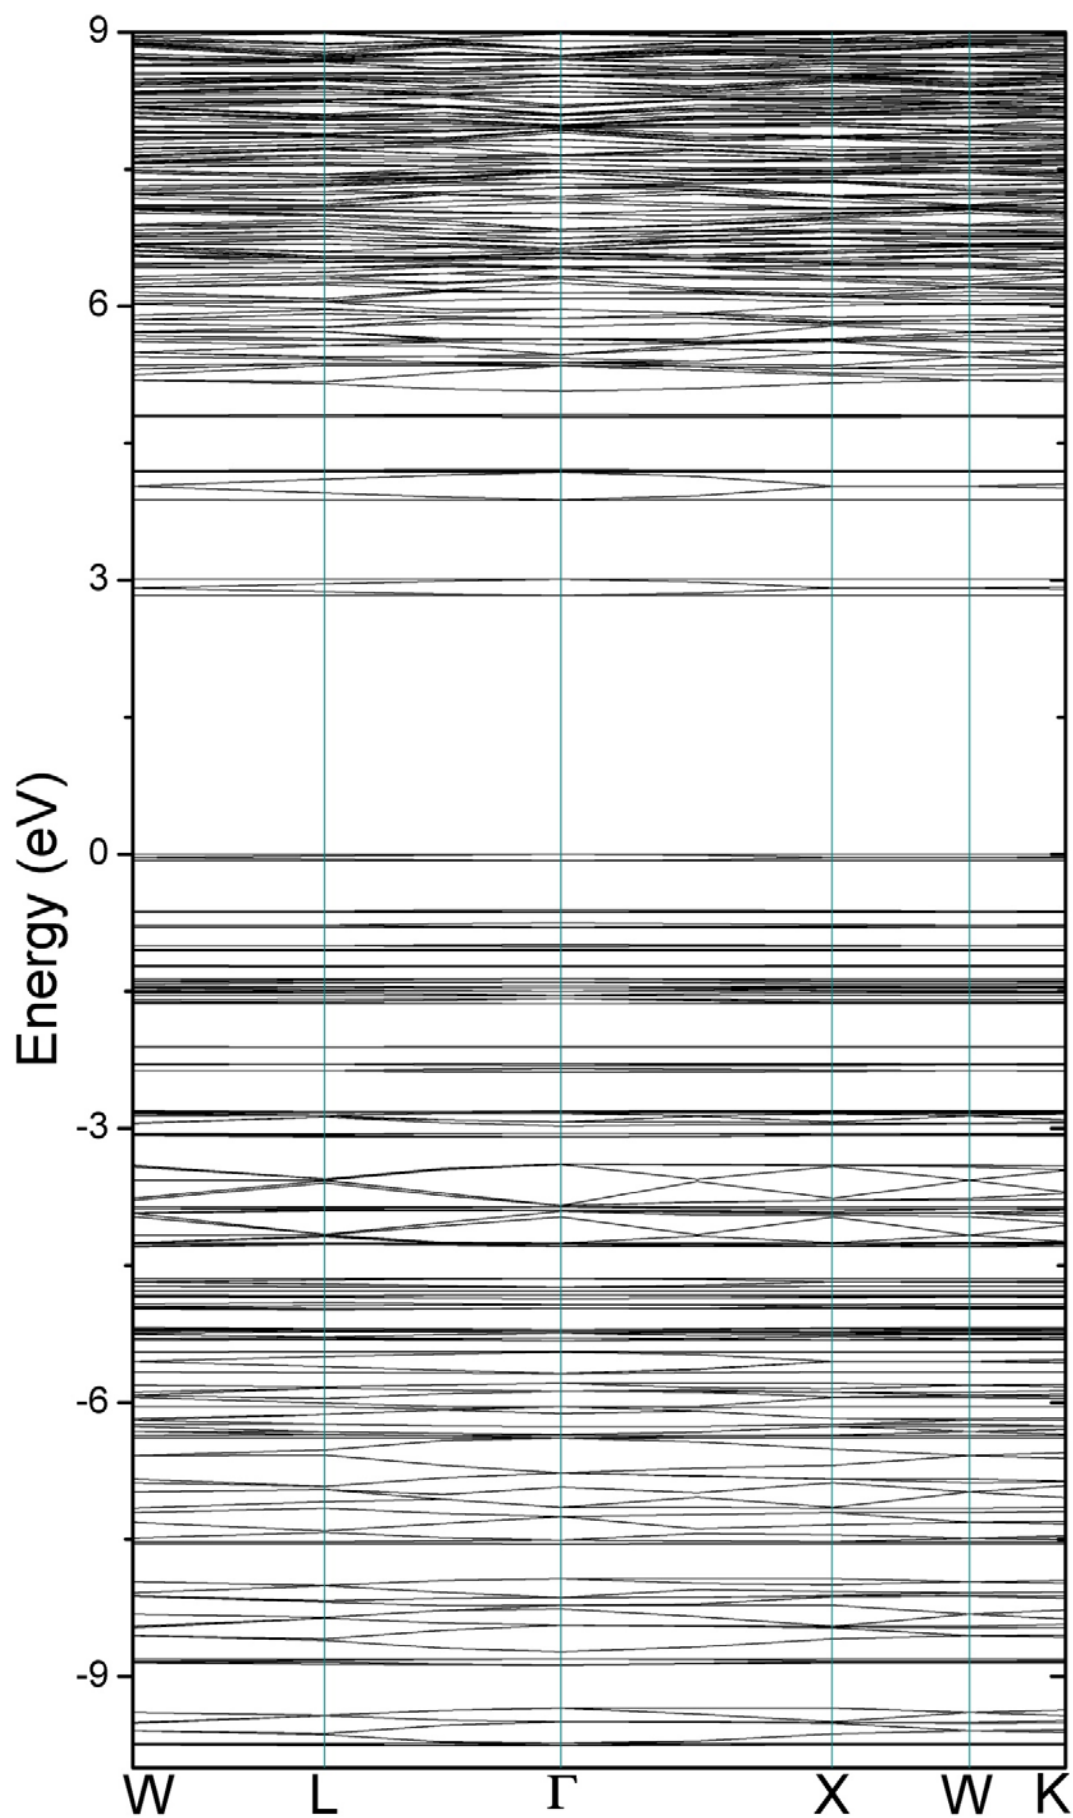

**Figure S20.** The electronic band structure of Be-IRMOF-10. The Fermi level is set to zero and placed in the valence band maximum.

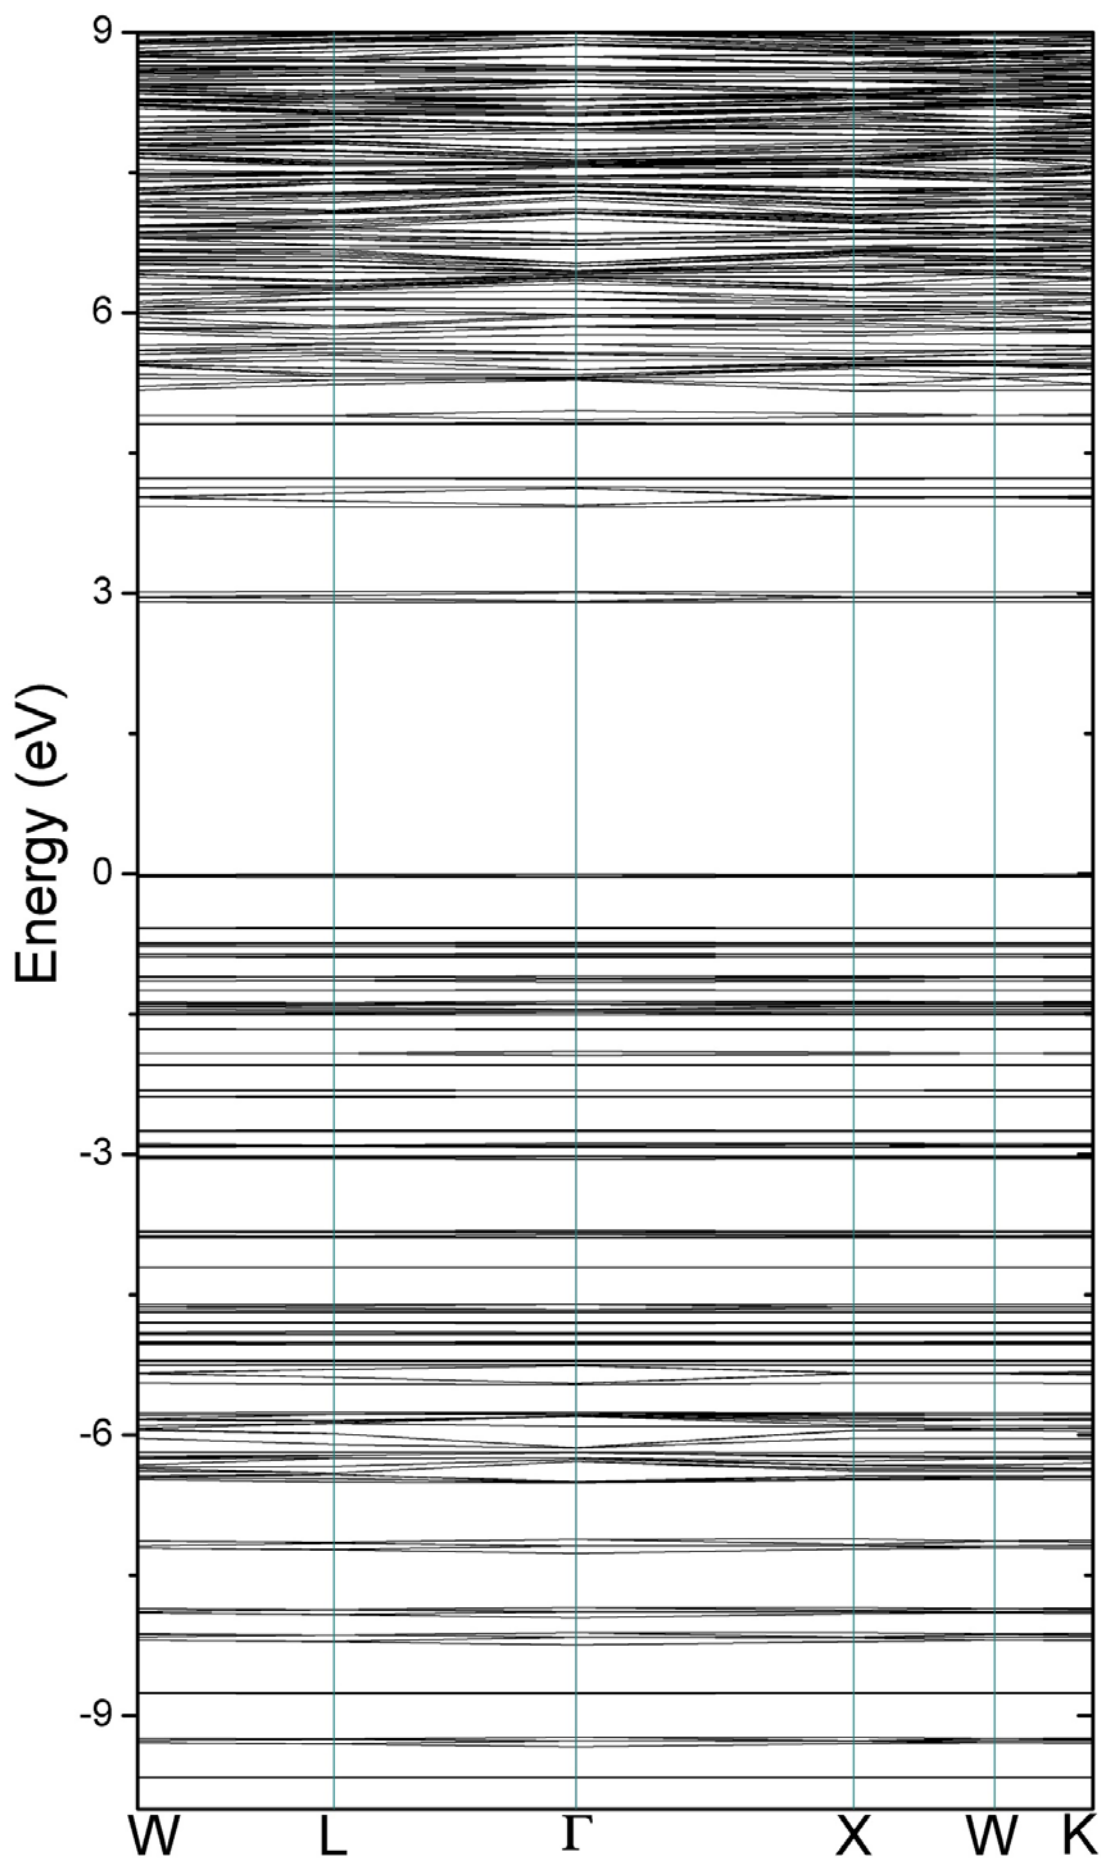

**Figure S21.** The electronic band structure of Mg-IRMOF-10. The Fermi level is set to zero and placed in the valence band maximum.

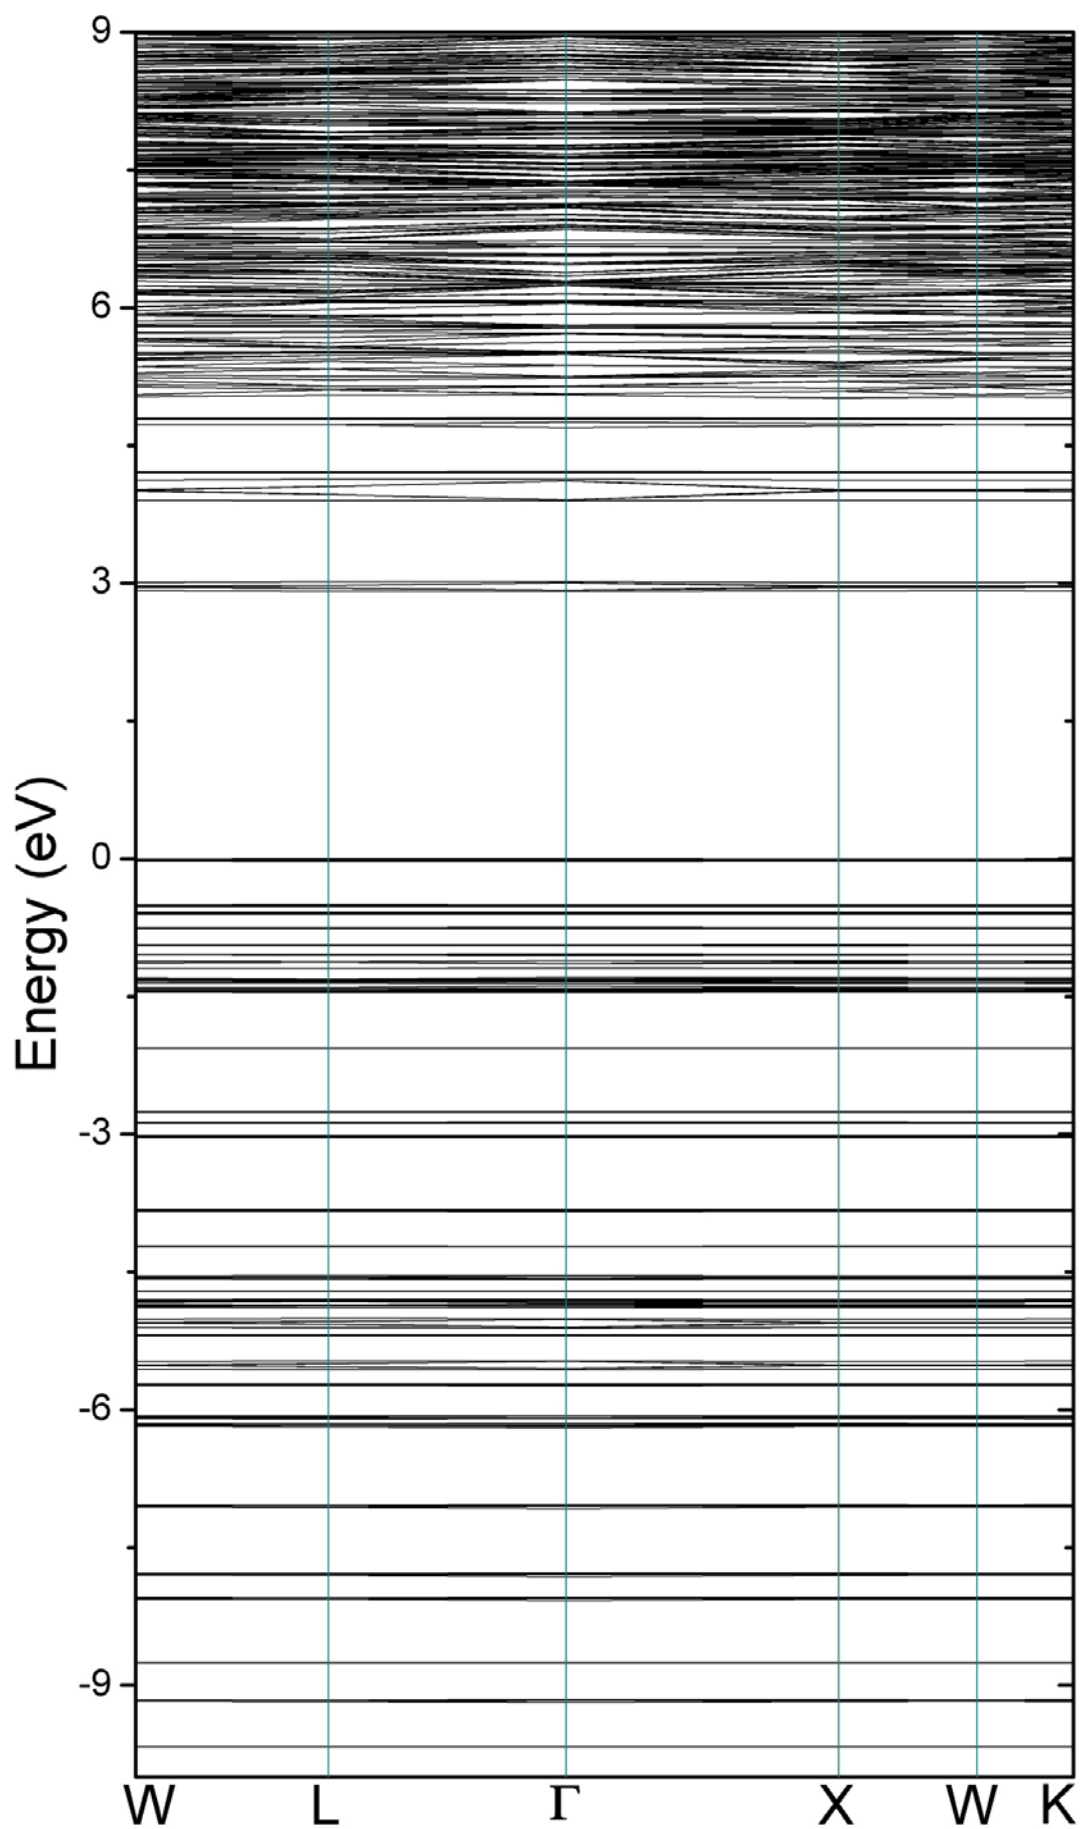

**Figure S22.** The electronic band structure of Ca-IRMOF-10. The Fermi level is set to zero and placed in the valence band maximum.



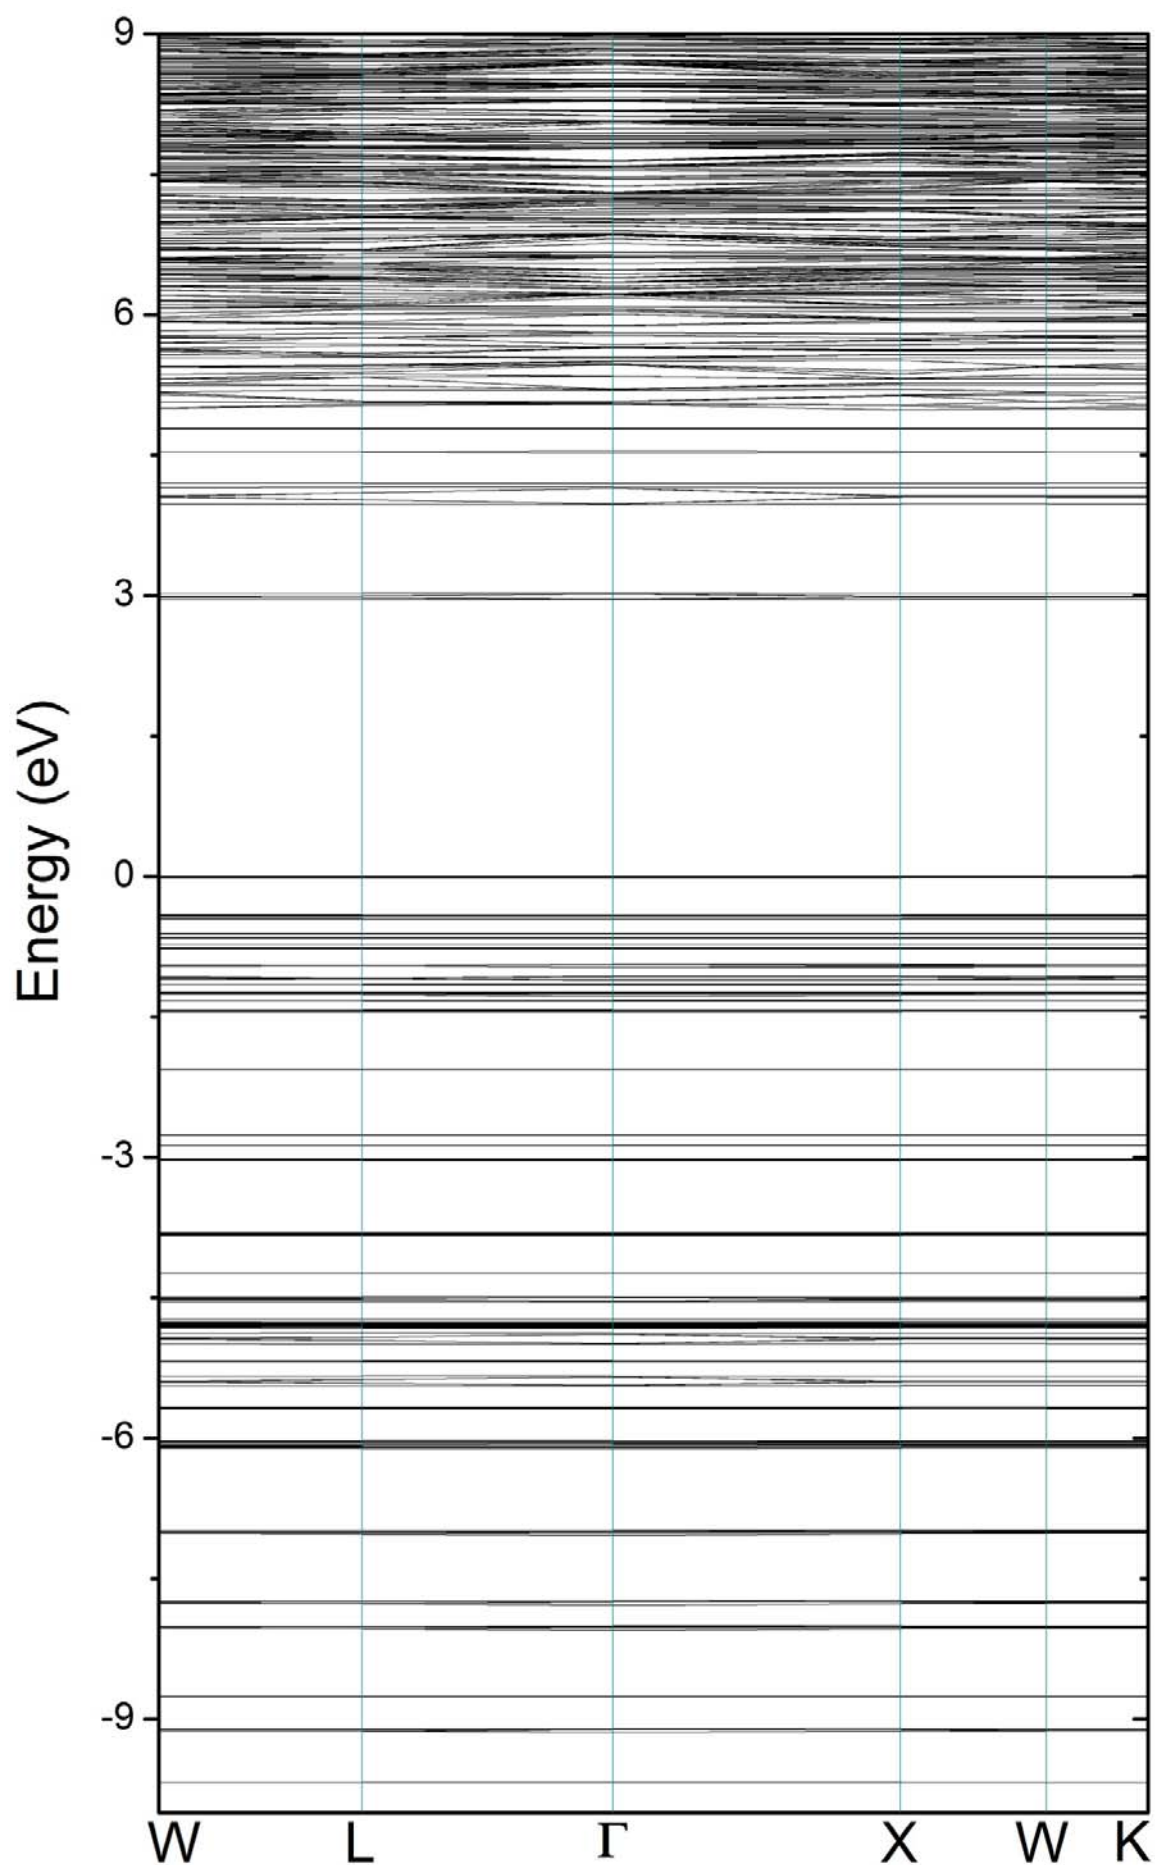

**Figure S23.** The electronic band structure of Sr-IRMOF-10. The Fermi level is set to zero and placed in the valence band maximum.

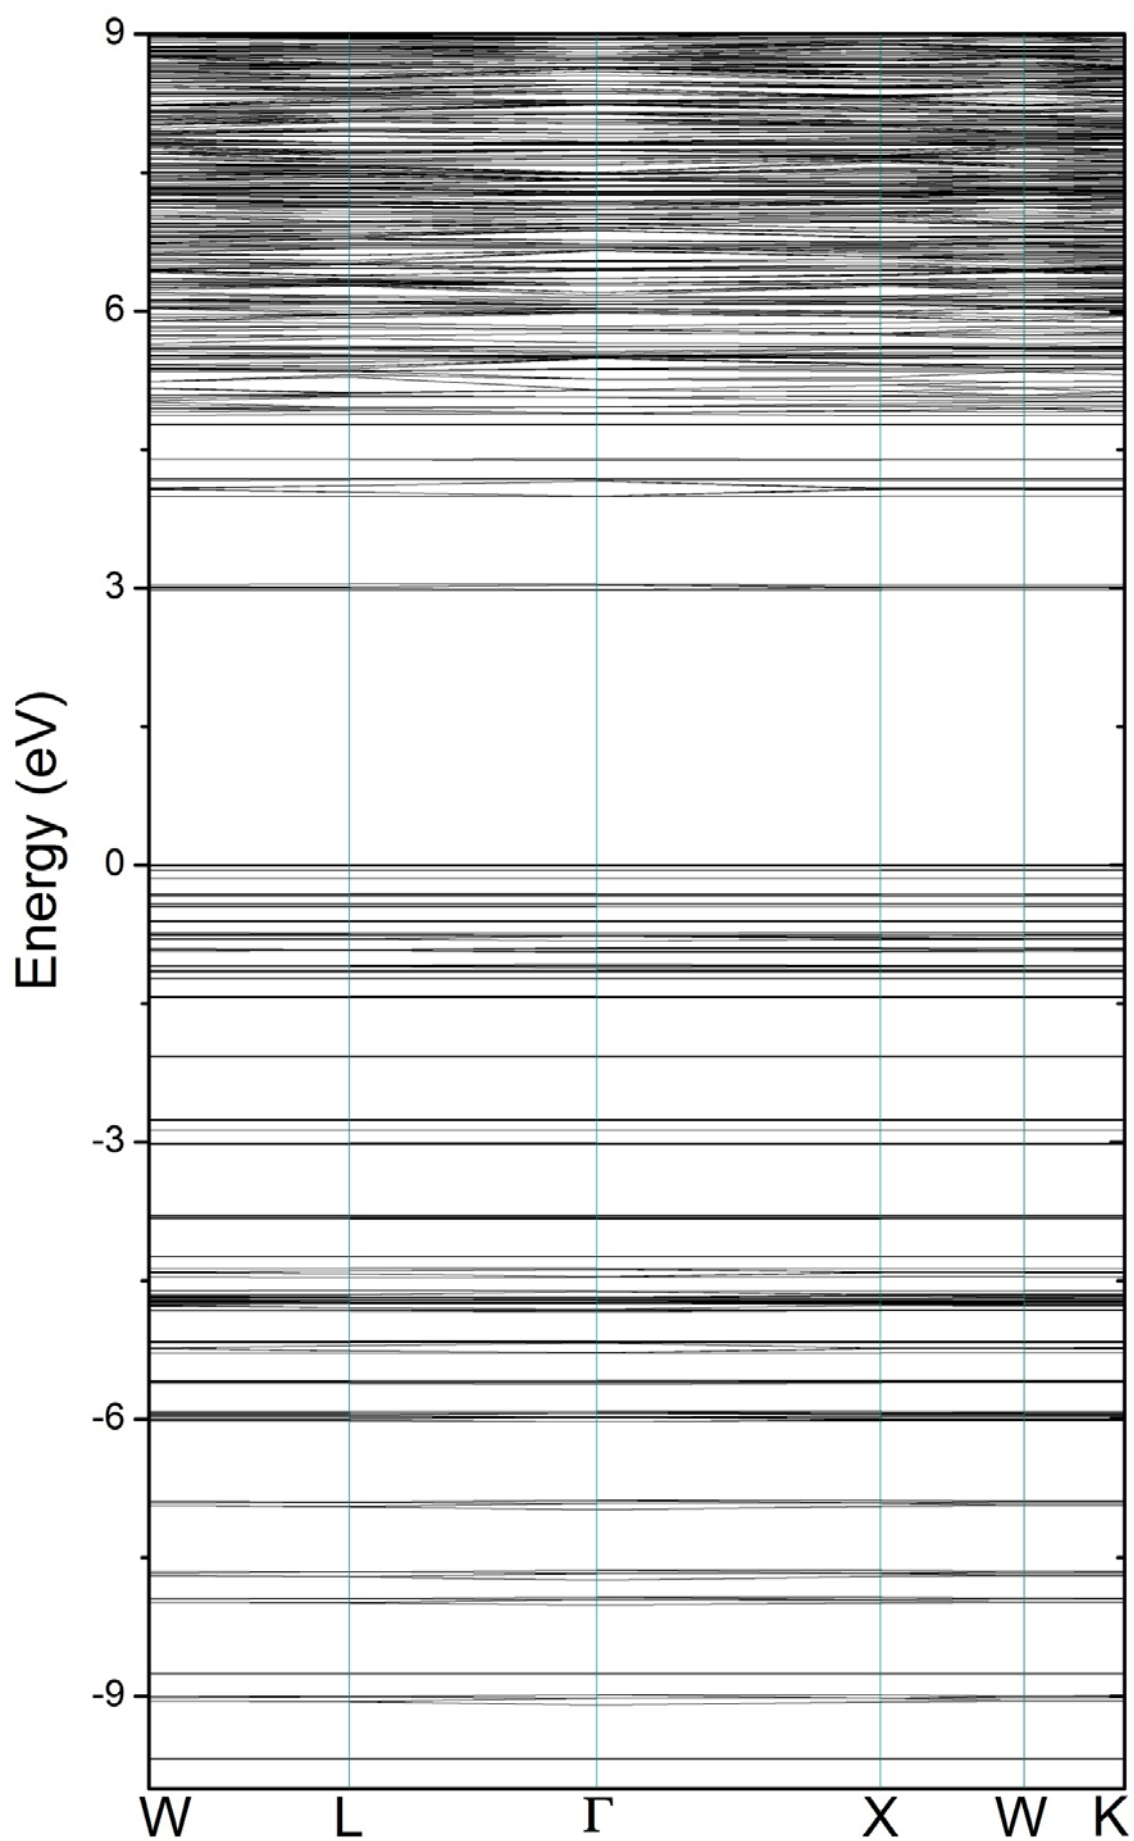

**Figure S24.** The electronic band structure of Ba-IRMOF-10. The Fermi level is set to zero and placed in the valence band maximum.
